# Supplementary material for: Nano-MoO3-mediated synthesis of bioactive thiazolidin-4-ones acting as anti-bacterial agents and their mode-of-action analysis using in silico target prediction, docking and similarity searching
Source: Royal Society of Chemistry journal article supplement (doi:10.1039/c5nj02729b), 2015-12-16

**Nano-MoO<sub>3</sub> mediated synthesis of bioactive thiazolidin-4-ones and  
their anti-bacterial mode-of-action analysis using *in silico* target  
prediction, docking and similarity searching.**

**Supplementary Information**

**Table of contents**

|                                                       |       |
|-------------------------------------------------------|-------|
| Spectral characterization of compound <b>3b</b> ..... | SI-01 |
| Spectral characterization of compound <b>3c</b> ..... | SI-02 |
| Spectral characterization of compound <b>3d</b> ..... | SI-03 |
| Spectral characterization of compound <b>3e</b> ..... | SI-04 |
| Spectral characterization of compound <b>3f</b> ..... | SI-05 |
| Spectral characterization of compound <b>3g</b> ..... | SI-06 |
| Spectral characterization of compound <b>3h</b> ..... | SI-07 |
| Spectral characterization of compound <b>3i</b> ..... | SI-08 |
| Spectral characterization of compound <b>3j</b> ..... | SI-09 |
| Spectral characterization of compound <b>3k</b> ..... | SI-10 |
| Spectral characterization of compound <b>3l</b> ..... | SI-11 |
| Spectral characterization of compound <b>3m</b> ..... | SI-12 |
| Spectral characterization of compound <b>3n</b> ..... | SI-13 |
| Spectral characterization of compound <b>3o</b> ..... | SI-14 |

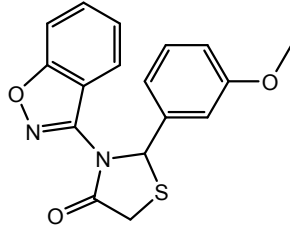

**3b**

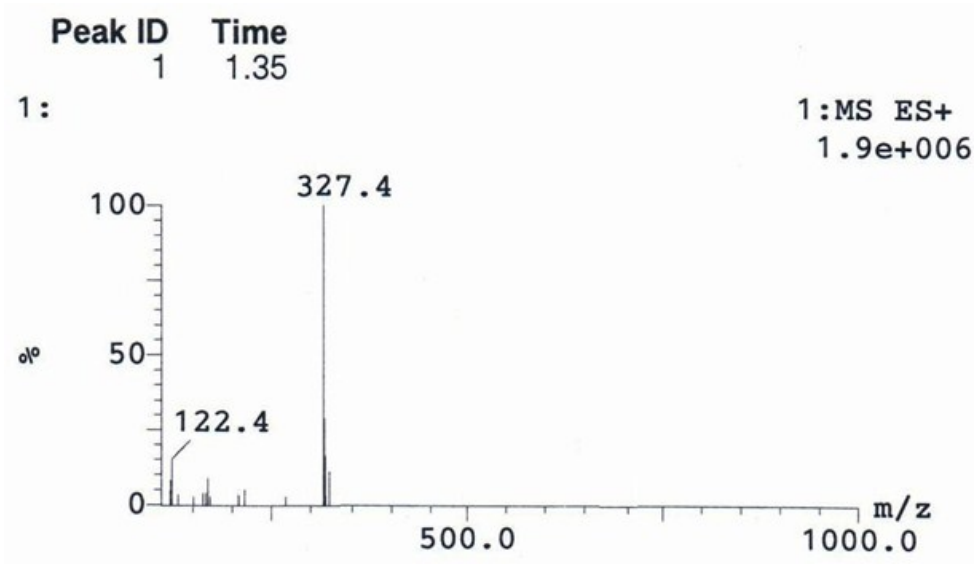

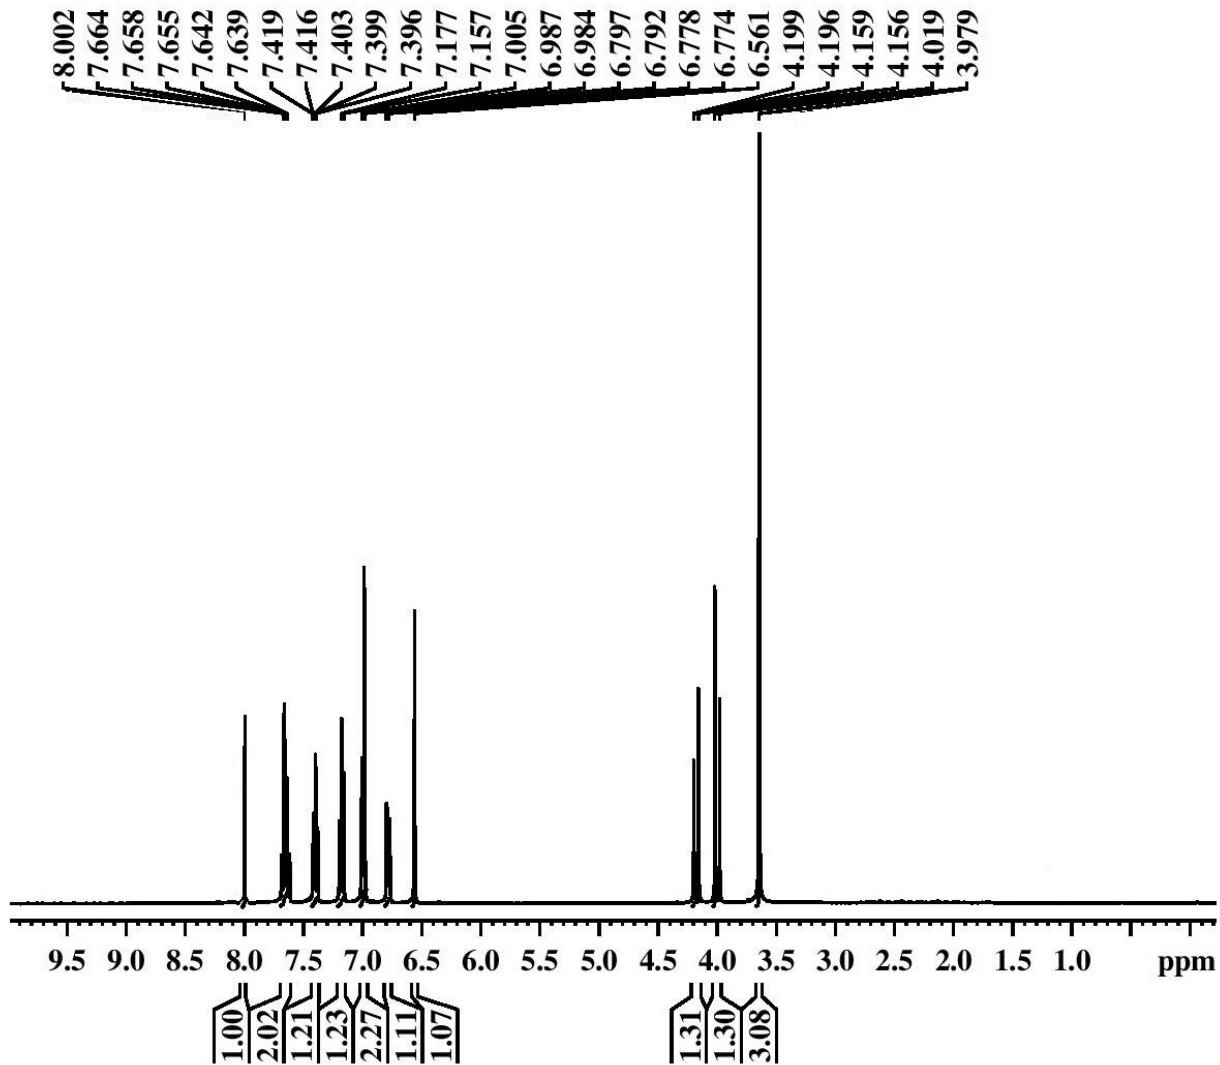

Sample Name:  
3b-13C  
Data Collected on:  
Agilent-NMR-vnmrs400  
Archive directory:

Sample directory:  
FidFile: CARBON

Pulse Sequence: CARBON (s2pul)  
Solvent: cdcl3  
Data collected on: Dec 29 2014

Temp. 25.0 C / 298.1 K  
Operator: vnmr1

Relax. delay 1.000 sec  
Pulse 45.0 degrees  
Acq. time 1.311 sec  
Width 25000.0 Hz  
1000 repetitions  
OBSERVE C13, 100.5362583 MHz  
DECOUPLE H1, 399.8277233 MHz  
Power 40 dB  
continuously on  
WALTZ-16 modulated  
DATA PROCESSING  
Line broadening 2.0 Hz  
FT size 65536  
Total time 38 min

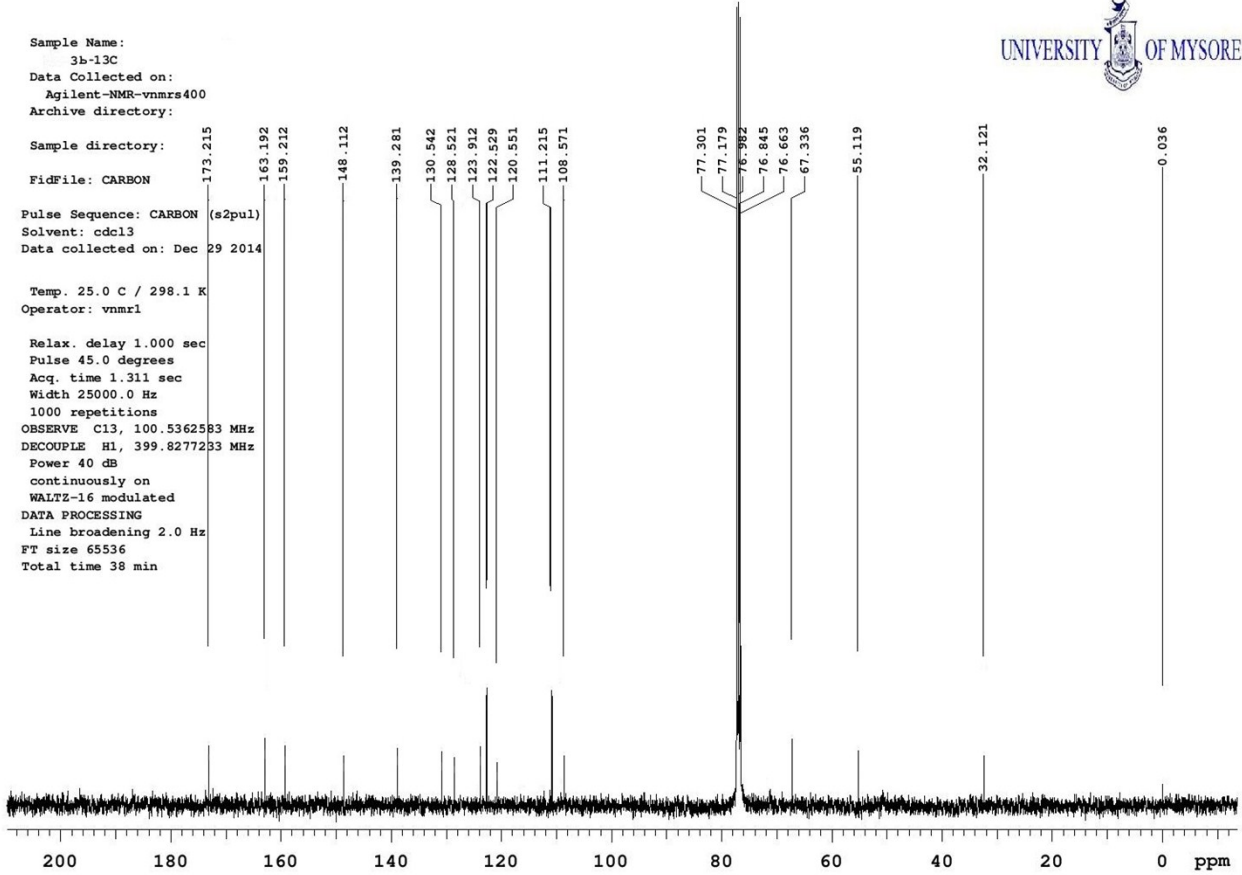

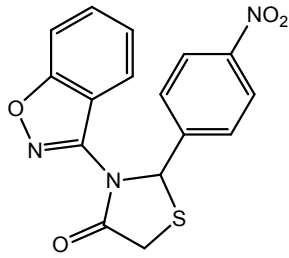

3c

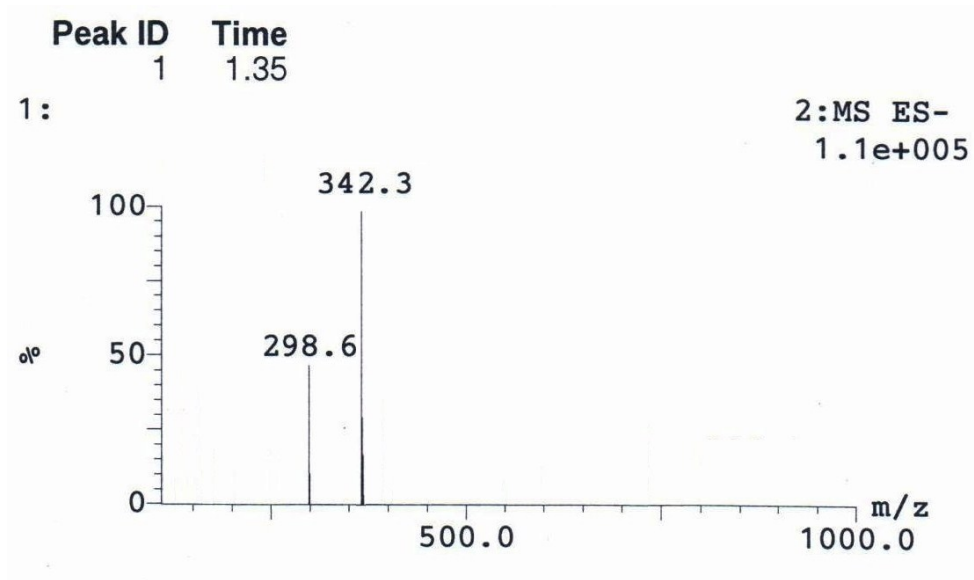

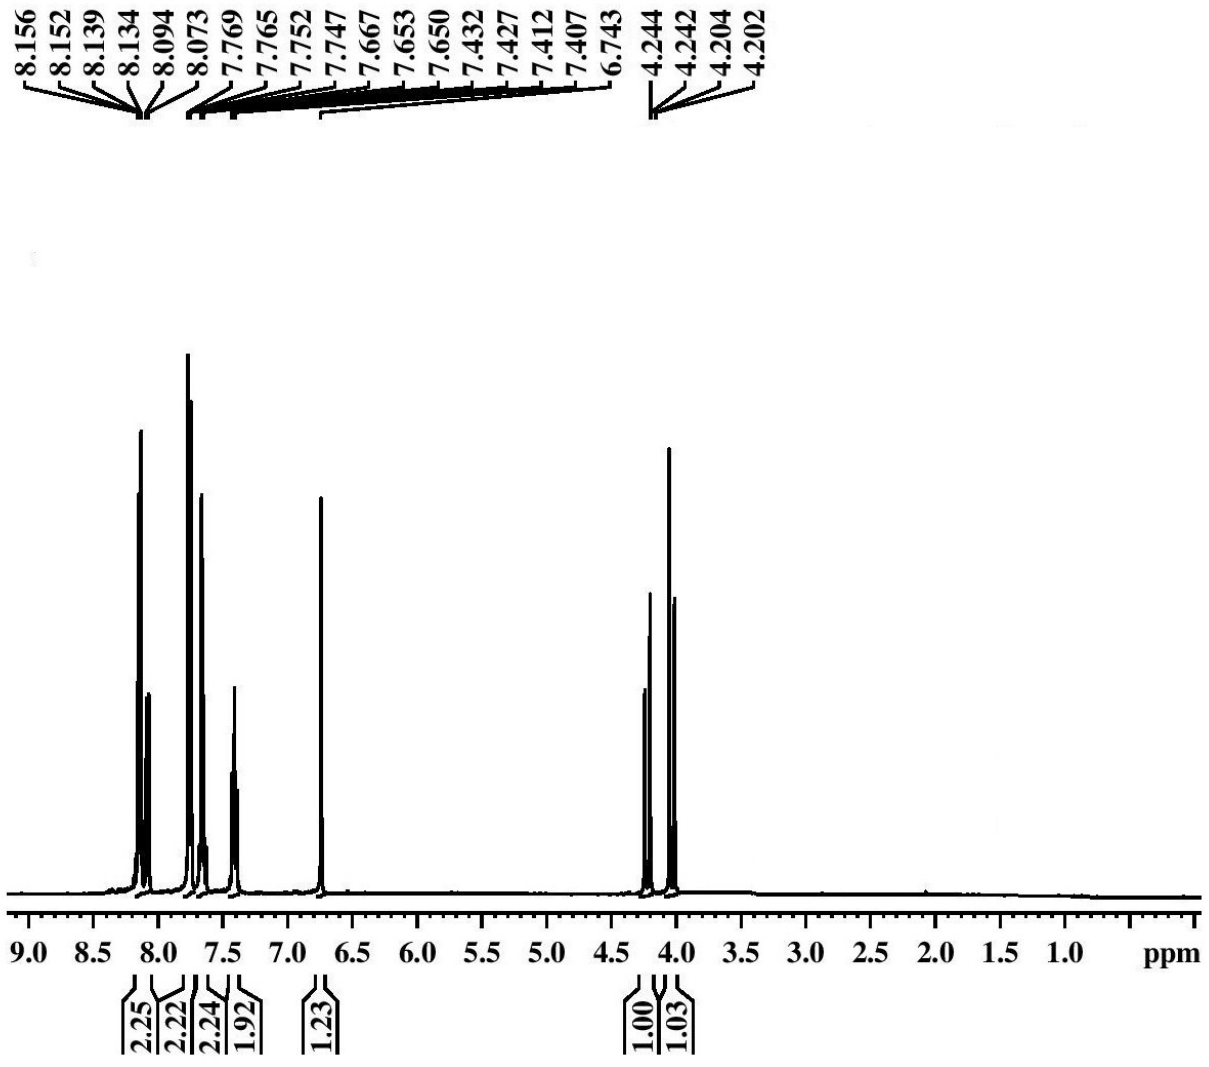

Sample Name:  
3c-13C  
Data Collected on:  
Agilent-NMR-vnmrs400  
Archive directory:

Sample directory:

FidFile: CARBON

Pulse Sequence: CARBON (s2pul)  
Solvent: dmsd  
Data collected on: Dec 29 2014

Temp. 25.0 C / 298.1 K  
Operator: vnmr1

Relax. delay 1.000 sec  
Pulse 45.0 degrees  
Acq. time 1.311 sec  
Width 25000.0 Hz  
1000 repetitions  
OBSERVE C13, 100.5362583 MHz  
DECOUPLE H1, 399.8277233 MHz  
Power 40 dB  
continuously on  
WALTZ-16 modulated  
DATA PROCESSING  
Line broadening 2.0 Hz  
FT size 65536  
Total time 38 min

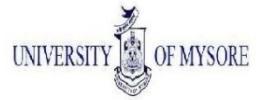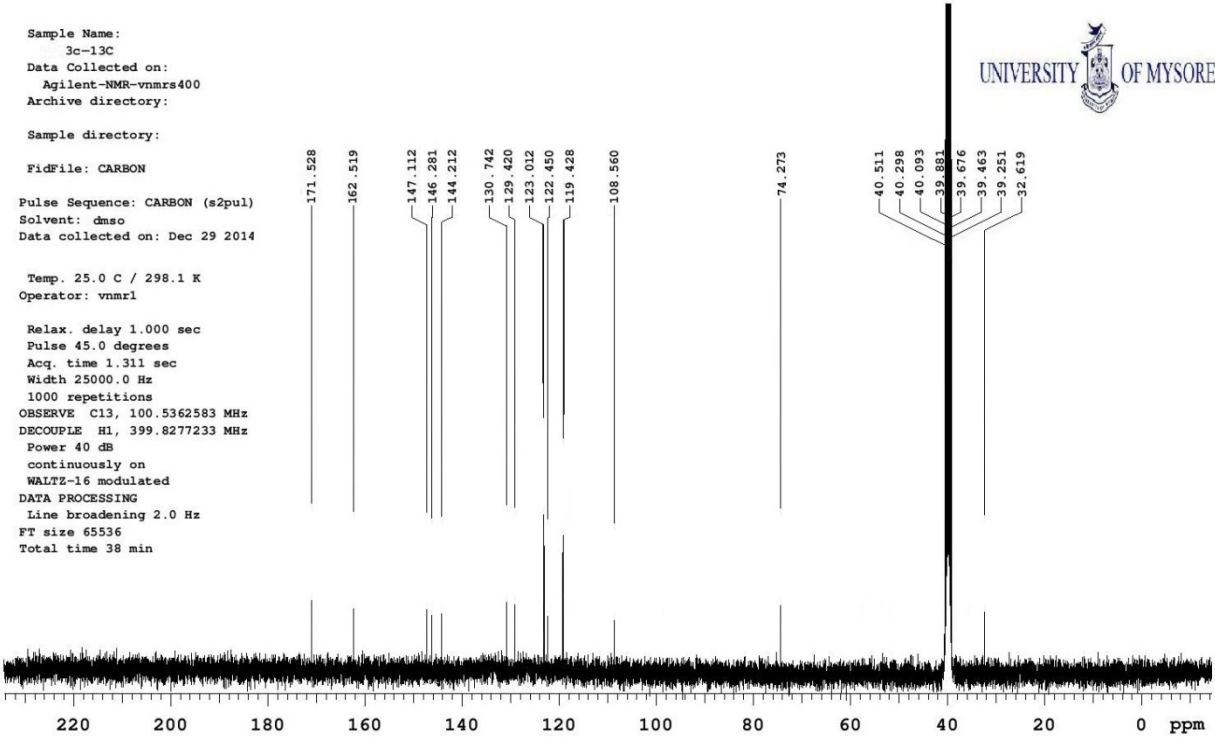

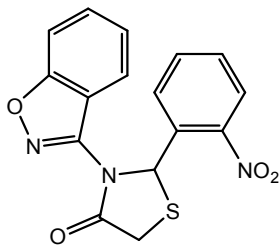

3d

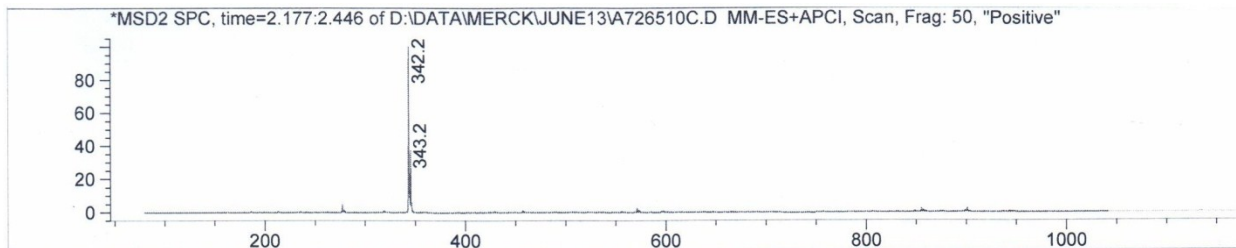

8.168  
8.166  
8.150  
8.147  
8.145  
8.107  
8.088  
8.086  
7.716  
7.711  
7.697  
7.694  
7.674  
7.672  
7.666  
7.664  
7.663  
7.660  
7.567  
7.421  
6.862  
4.207  
4.204  
4.166  
4.163

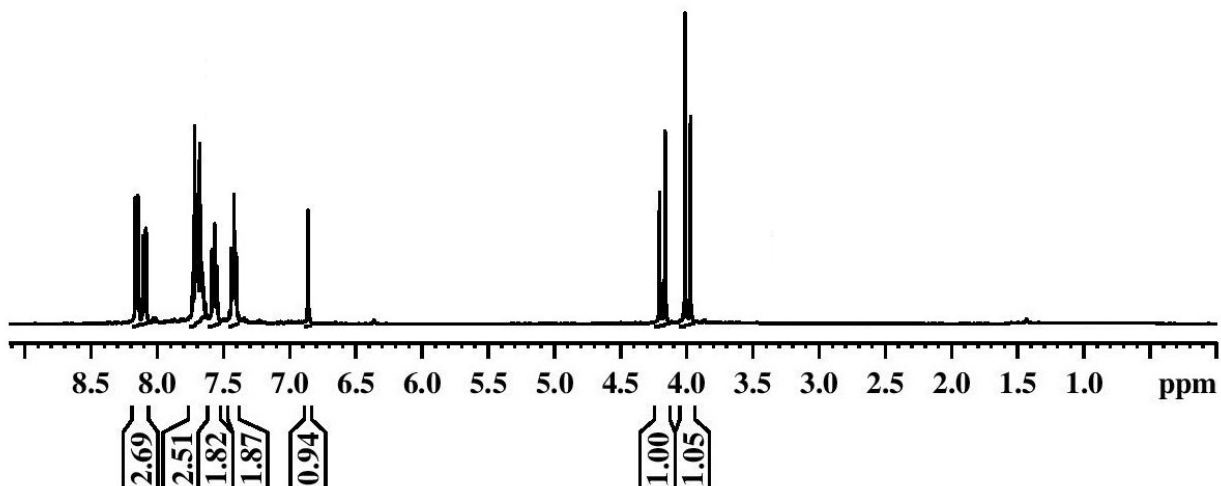



Sample Name:  
3d-13C  
Data Collected on:  
Agilent-NMR-vnmrs400  
Archive directory:

Sample directory:

FidFile: CARBON

Pulse Sequence: CARBON (s2pul)  
Solvent: dmsd  
Data collected on: Nov 25 2015

Temp. 25.0 C / 298.1 K  
Operator: vnmr1

Relax. delay 1.000 sec  
Pulse 45.0 degrees  
Acq. time 1.311 sec  
Width 25000.0 Hz  
1000 repetitions  
OBSERVE C13, 100.5362583 MHz  
DECOUPLE H1, 399.8277233 MHz  
Power 40 dB  
continuously on  
WALTZ-16 modulated  
DATA PROCESSING  
Line broadening 2.0 Hz  
FT size 65536  
Total time 38 min

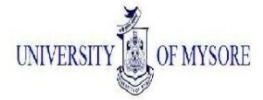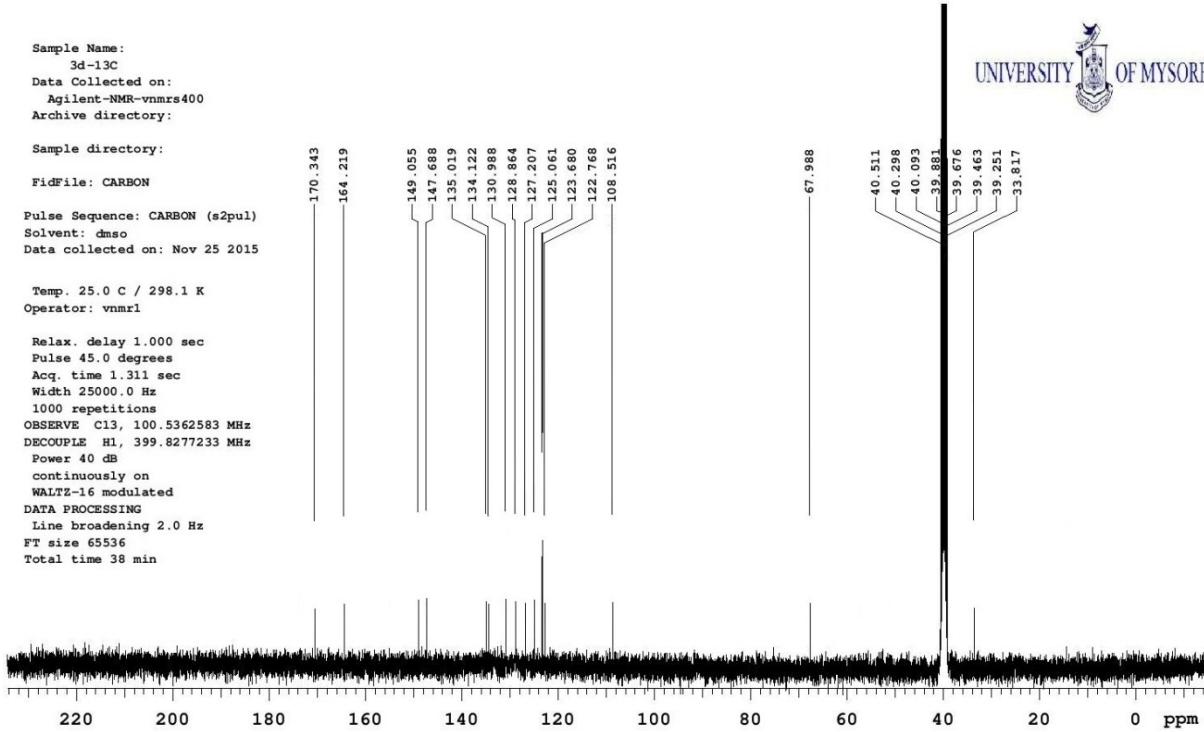

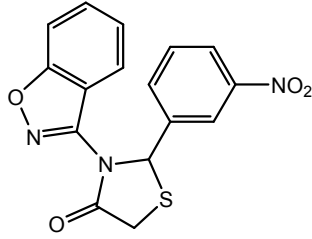

3e

Method DEF\_MS.M

Sample Name

Operator  
Instrument

MBU  
HCTUltra ETD II

Acquisition Parameter

Ion Source Type ESI  
Mass Range Mode 319  $\mu$ s  
Capillary Exit 109.0 Volt  
Accumulation Time Ultra Scan

Ion Polarity Positive  
Scan Begin 50 m/z  
Skimmer 40.0 Volt  
Averages 5 Spectra

Alternating Ion Polarity off  
Scan End 1300 m/z  
Trap Drive 49.6  
Auto MS/MS off

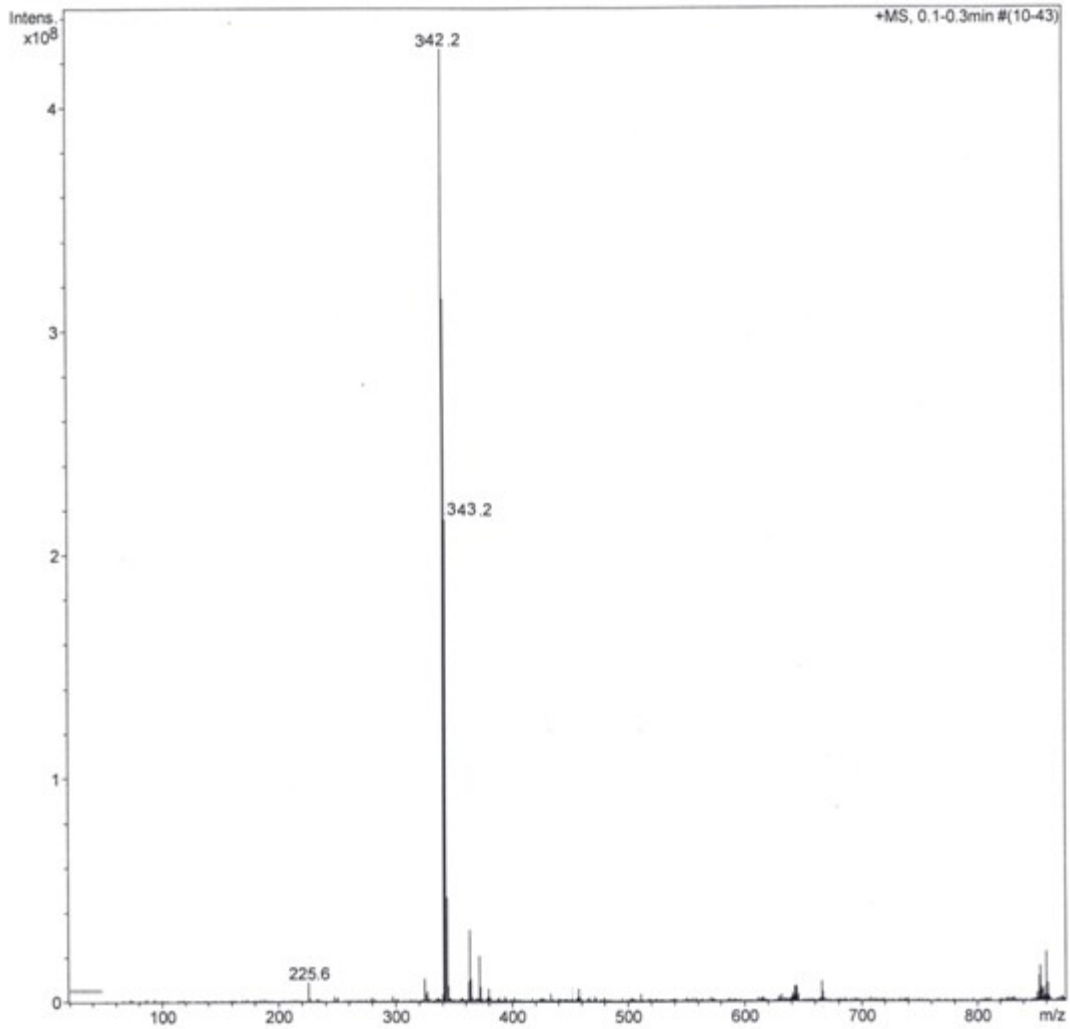

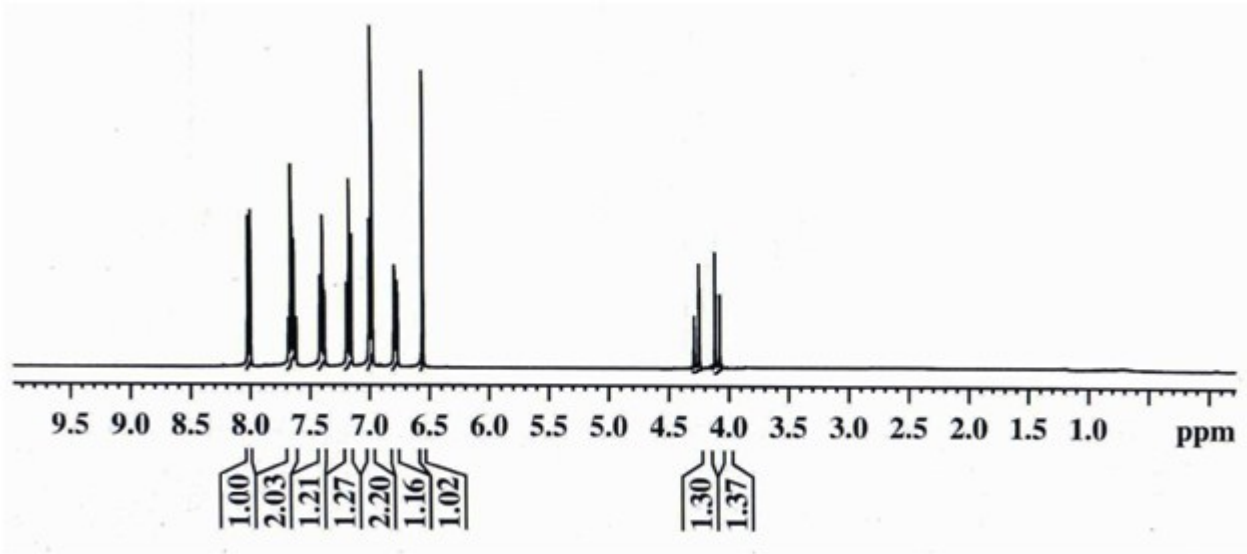

Sample Name:  
 3e-13C  
 Data Collected on:  
 Agilent-NMR-vmrns400  
 Archive directory:  
 Sample directory:  
 FidFile: CARBON  
 Pulse Sequence: CARBON (s2pul)  
 Solvent: dmsd  
 Data collected on: Nov 25 2015  
 Temp. 25.0 C / 298.1 K  
 Operator: vnmrl  
 Relax. delay 1.000 sec  
 Pulse 45.0 degrees  
 Acq. time 1.311 sec  
 Width 25000.0 Hz  
 1000 repetitions  
 OBSERVE C13, 100.5362583 MHz  
 DECOUPLE H1, 399.8277233 MHz  
 Power 40 dB  
 continuously on  
 WALTZ-16 modulated  
 DATA PROCESSING  
 Line broadening 2.0 Hz  
 FT size 65536  
 Total time 38 min

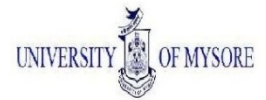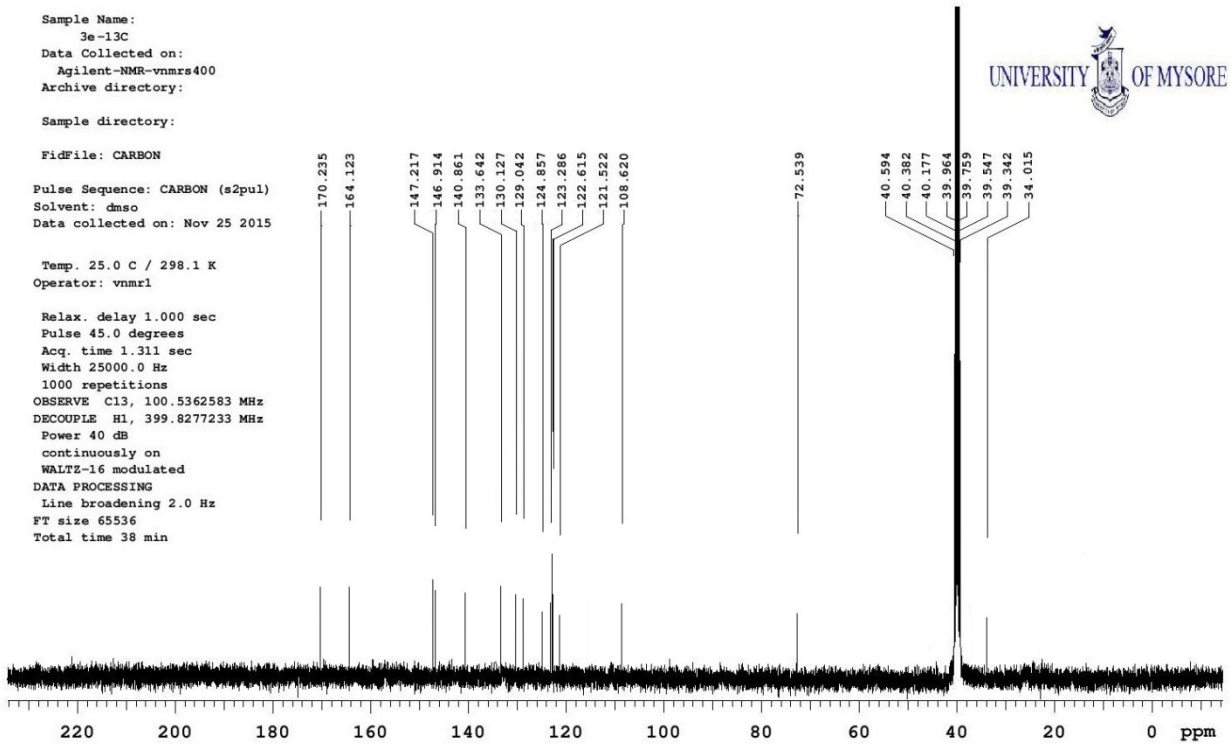

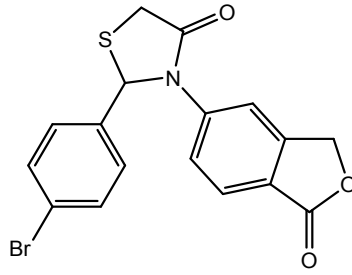

**3f**

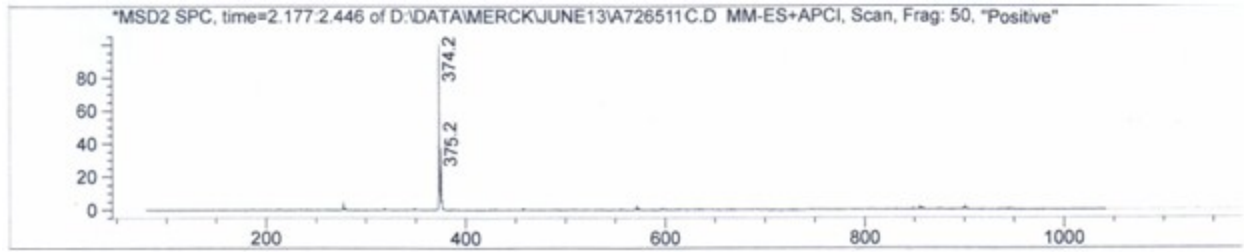

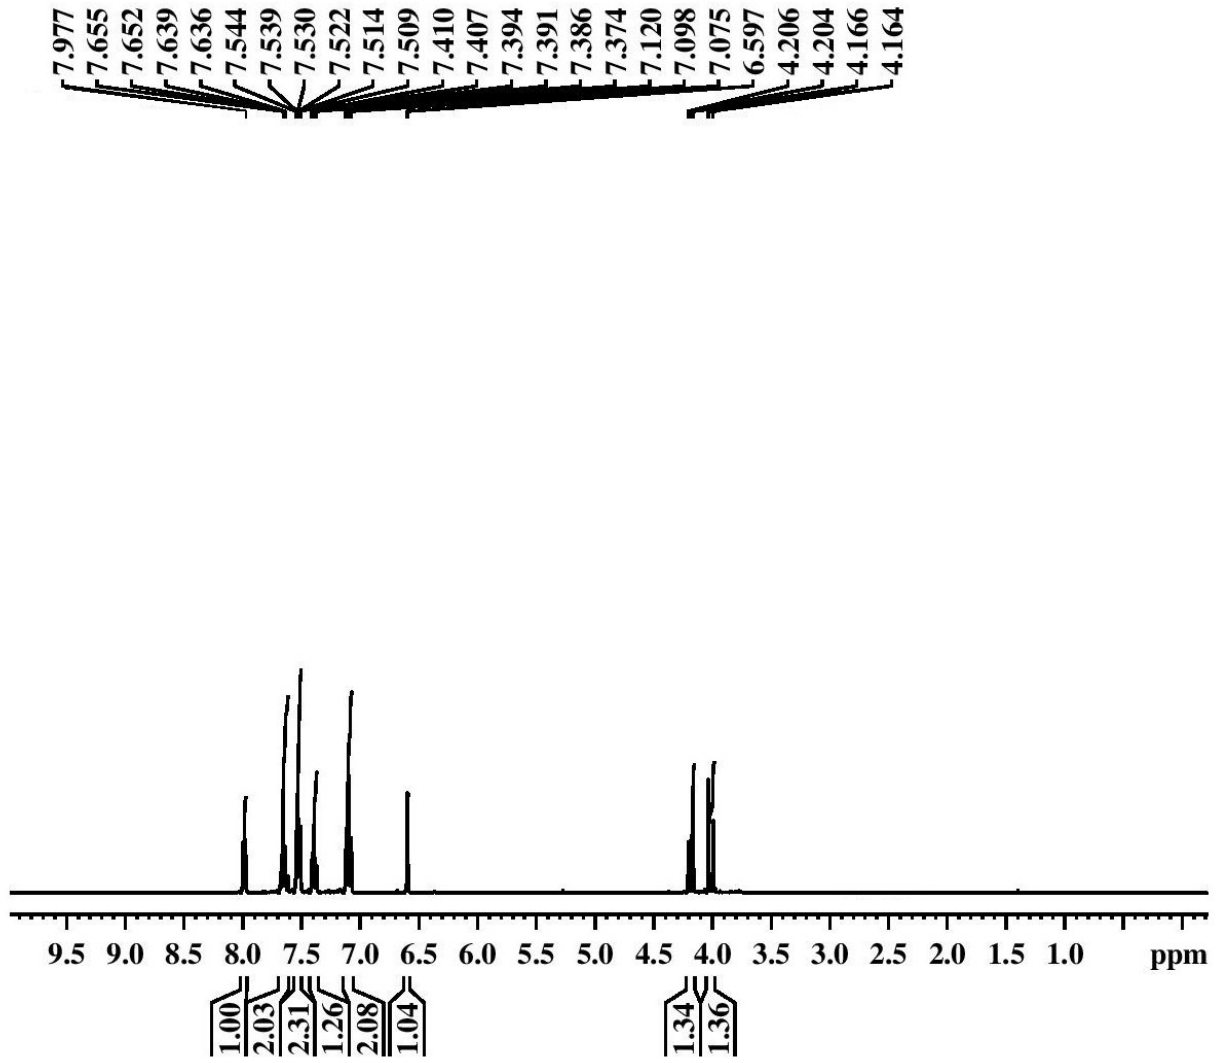

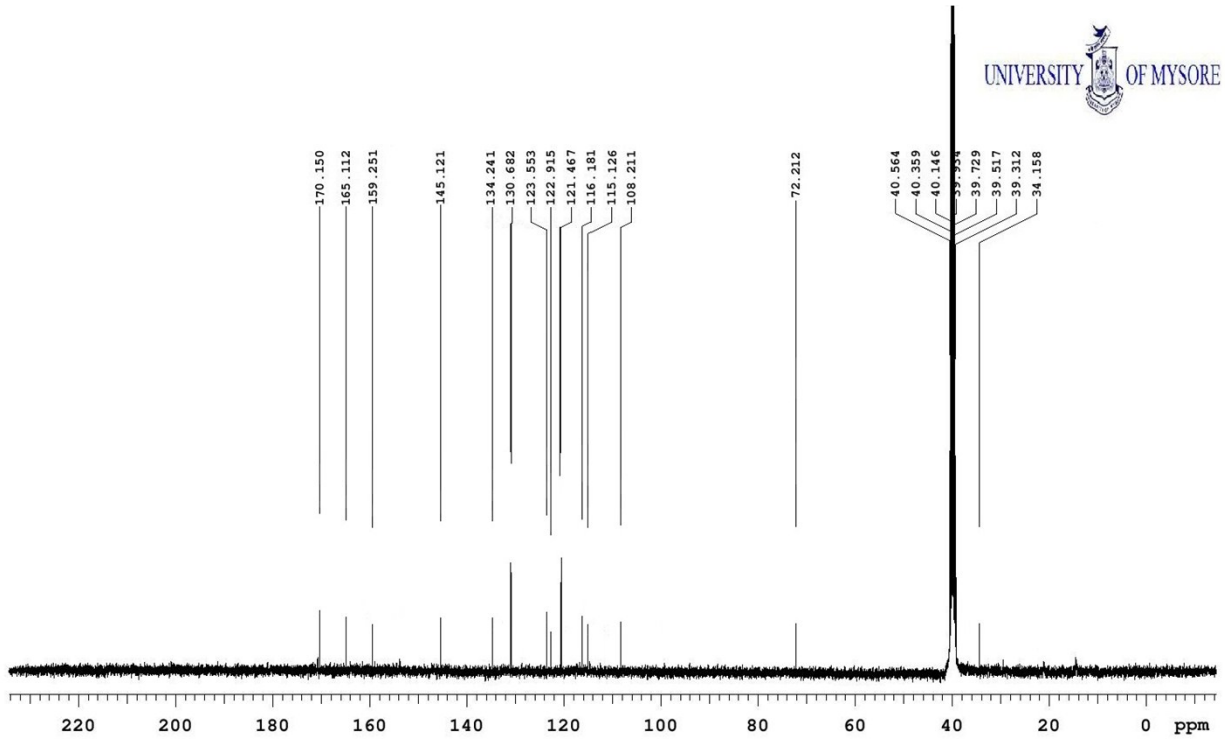

|                                                                                                                                                                                               |                                                                                                                                                                   |                                                                                                                                  |                                                                                                                                                                                            |
|-----------------------------------------------------------------------------------------------------------------------------------------------------------------------------------------------|-------------------------------------------------------------------------------------------------------------------------------------------------------------------|----------------------------------------------------------------------------------------------------------------------------------|--------------------------------------------------------------------------------------------------------------------------------------------------------------------------------------------|
| <p><b>PULSE SEQUENCE</b><br/>         Relax. delay 1.000 sec<br/>         Pulse 45.0 degrees<br/>         Acq. time 1.311 sec<br/>         Width 25000.0 Hz<br/>         3000 repetitions</p> | <p><b>OBSERVE</b> C13, 100.5367359<br/> <b>DECOUPLE</b> H1, 399.8296225<br/>         Power 40 dB<br/>         continuously on<br/>         WALTZ-16 modulated</p> | <p><b>DATA PROCESSING</b><br/>         Line broadening 0.5 Hz<br/>         FT size 65536<br/>         Total time 115 minutes</p> | <p>1402373-3F-13C<br/><br/>         Solvent: dmsd<br/>         Ambient temperature<br/>         Operator: vnmr1<br/>         File: 1402373-3F-13C<br/>         VNMR5-400 "Agilent-NMR"</p> |
|-----------------------------------------------------------------------------------------------------------------------------------------------------------------------------------------------|-------------------------------------------------------------------------------------------------------------------------------------------------------------------|----------------------------------------------------------------------------------------------------------------------------------|--------------------------------------------------------------------------------------------------------------------------------------------------------------------------------------------|

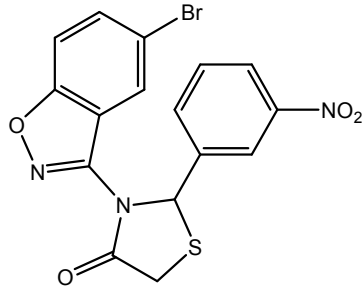

3g

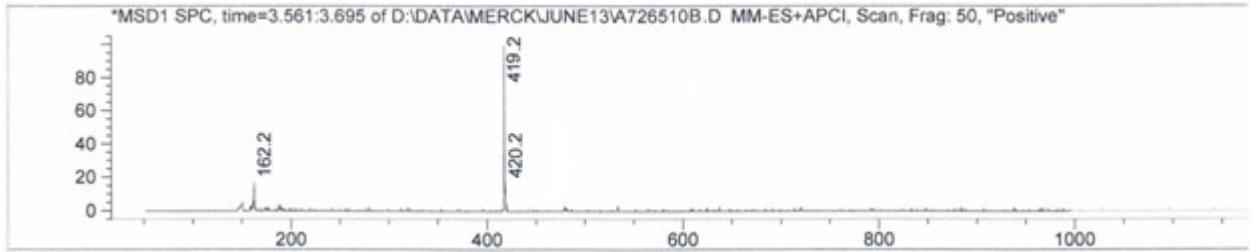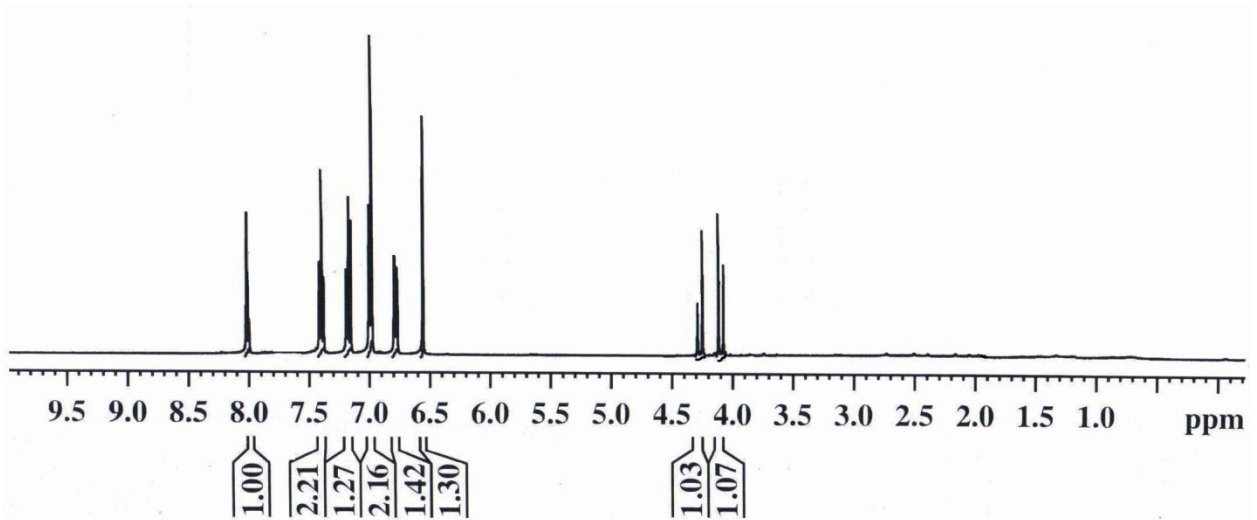

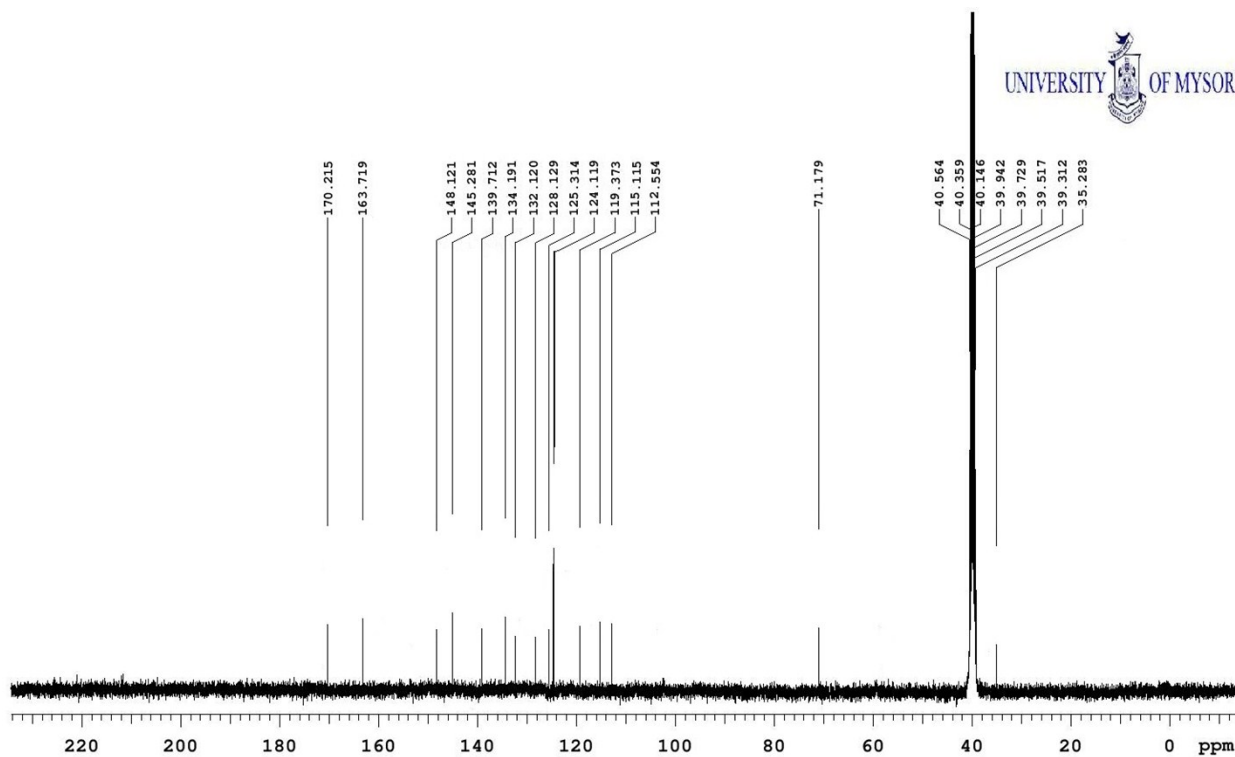

|                                                                                                                                                                                               |                                                                                                                                                                   |                                                                                                                                 |                                                                                                                                                                                       |
|-----------------------------------------------------------------------------------------------------------------------------------------------------------------------------------------------|-------------------------------------------------------------------------------------------------------------------------------------------------------------------|---------------------------------------------------------------------------------------------------------------------------------|---------------------------------------------------------------------------------------------------------------------------------------------------------------------------------------|
| <p><b>PULSE SEQUENCE</b><br/>         Relax. delay 1.000 sec<br/>         Pulse 45.0 degrees<br/>         Acq. time 1.311 sec<br/>         Width 25000.0 Hz<br/>         1650 repetitions</p> | <p><b>OBSERVE</b> C13, 100.5367359<br/> <b>DECOUPLE</b> H1, 399.8296225<br/>         Power 40 dB<br/>         continuously on<br/>         WALTZ-16 modulated</p> | <p><b>DATA PROCESSING</b><br/>         Line broadening 0.5 Hz<br/>         FT size 65536<br/>         Total time 63 minutes</p> | <p>1402372-3G-13C<br/>         Solvent: dmsc<br/>         Ambient temperature<br/>         Operator: vnmr1<br/>         File: 1402372-3G-13C<br/>         VNMRS-400 "Agilent-NMR"</p> |
|-----------------------------------------------------------------------------------------------------------------------------------------------------------------------------------------------|-------------------------------------------------------------------------------------------------------------------------------------------------------------------|---------------------------------------------------------------------------------------------------------------------------------|---------------------------------------------------------------------------------------------------------------------------------------------------------------------------------------|



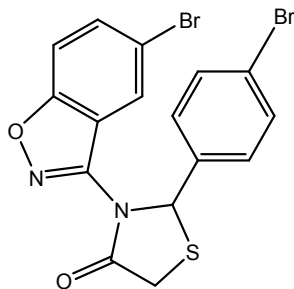

3h

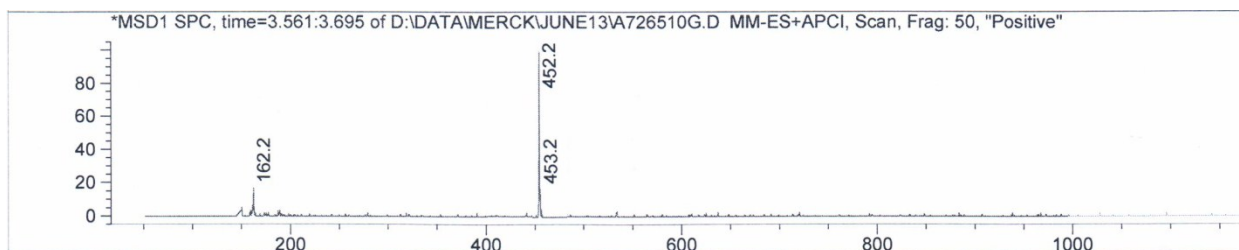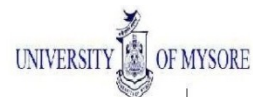

Sample Name:  
3H-1H  
Data Collected on:  
Agilent-NMR-vnmrs400  
Archive directory:  
Sample directory:  
FidFile: S22-3H-1H  
Pulse Sequence: PROTON (s2pul)  
Solvent: cdcl3  
Data collected on: Dec 29 2014  
Temp. 25.0 C / 298.1 K  
Operator: vnmrl  
Relax. delay 2.000 sec  
Pulse 90.0 degrees  
Acq. time 2.281 sec  
Width 7183.9 Hz  
64 repetitions  
OBSERVE H1, 399.8257191 MHz  
DATA PROCESSING  
Line broadening 0.3 Hz  
FT size 131072  
Total time 4 min 43 sec

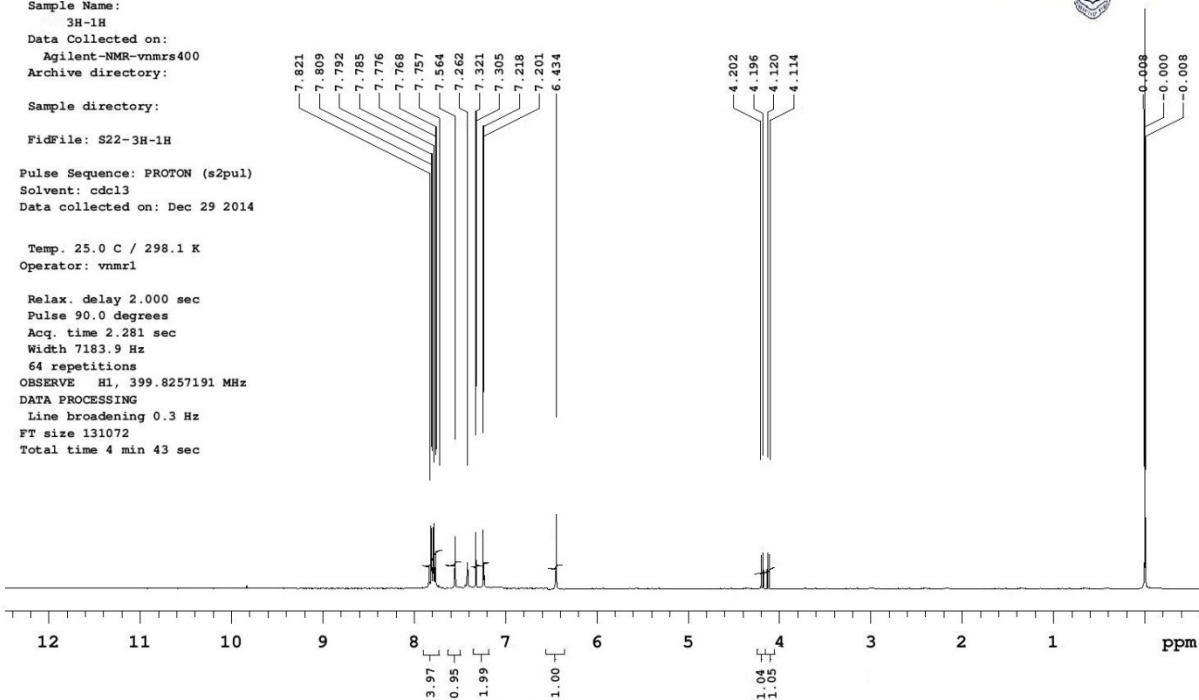

Sample Name:  
3h-13C  
Data Collected on:  
Agilent-NMR-vnmrs400  
Archive directory:

Sample directory:

FidFile: CARBON

Pulse Sequence: CARBON (s4pul)  
Solvent: cdcl3  
Data collected on: Nov 25 2015

Temp. 25.0 C / 298.1 K  
Operator: vnmr1

Relax. delay 1.000 sec  
Pulse 45.0 degrees  
Acq. time 1.311 sec  
Width 25000.0 Hz  
1000 repetitions  
OBSERVE C13, 100.5362583 MHz  
DECOUPLE H1, 399.8277233 MHz  
Power 40 dB  
continuously on  
WALTZ-16 modulated  
DATA PROCESSING  
Line broadening 2.0 Hz  
FT size 65536  
Total time 38 min

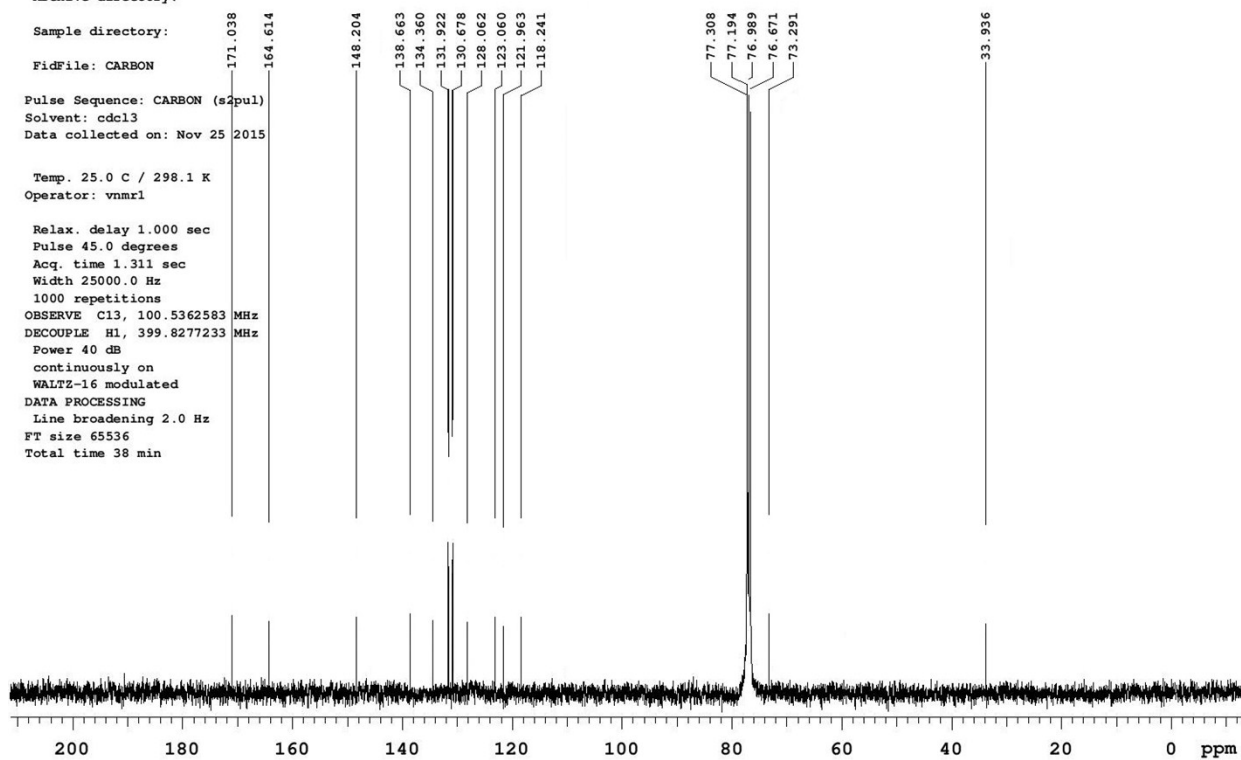

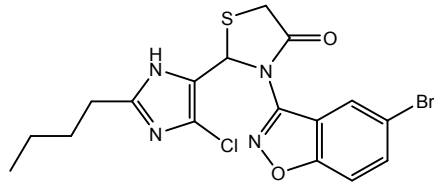

3i

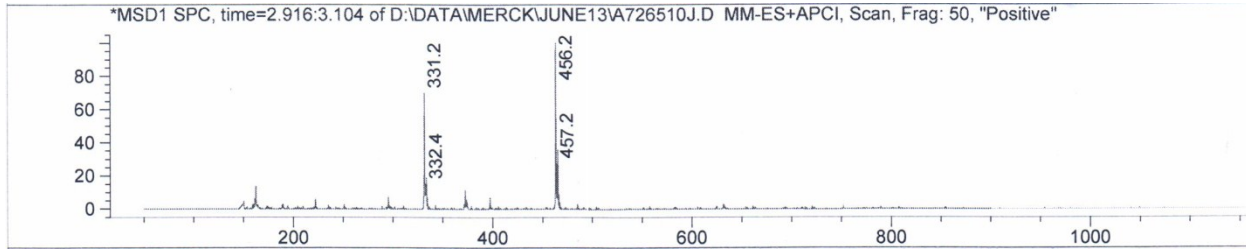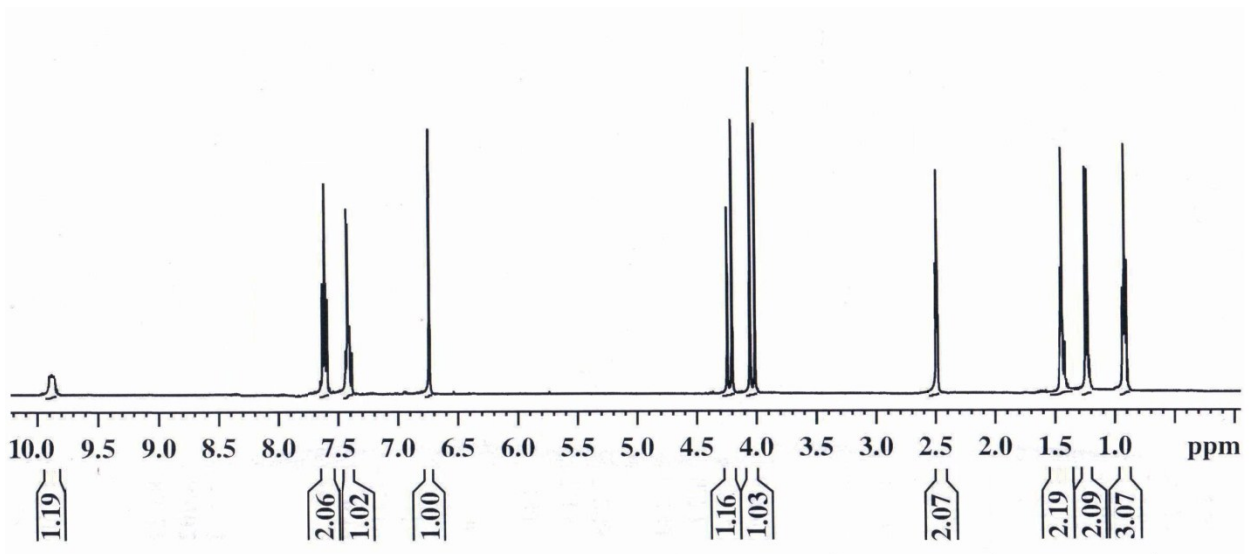

Sample Name:  
3i-13C  
Data Collected on:  
Agilent-NMR-vnmrs400  
Archive directory:

Sample directory:

FidFile: CARBON

Pulse Sequence: CARBON (s2pul)  
Solvent: dmsd  
Data collected on: Nov 25 2015

Temp. 25.0 C / 298.1 K  
Operator: vnmr1

Relax. delay 1.000 sec  
Pulse 45.0 degrees  
Acq. time 1.311 sec  
Width 25000.0 Hz  
1000 repetitions  
OBSERVE C13, 100.5362583 MHz  
DECOUPLE H1, 399.8277233 MHz  
Power 40 dB  
continuously on  
WALTZ-16 modulated  
DATA PROCESSING  
Line broadening 2.0 Hz  
FT size 65536  
Total time 38 min

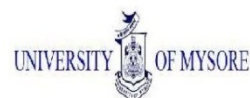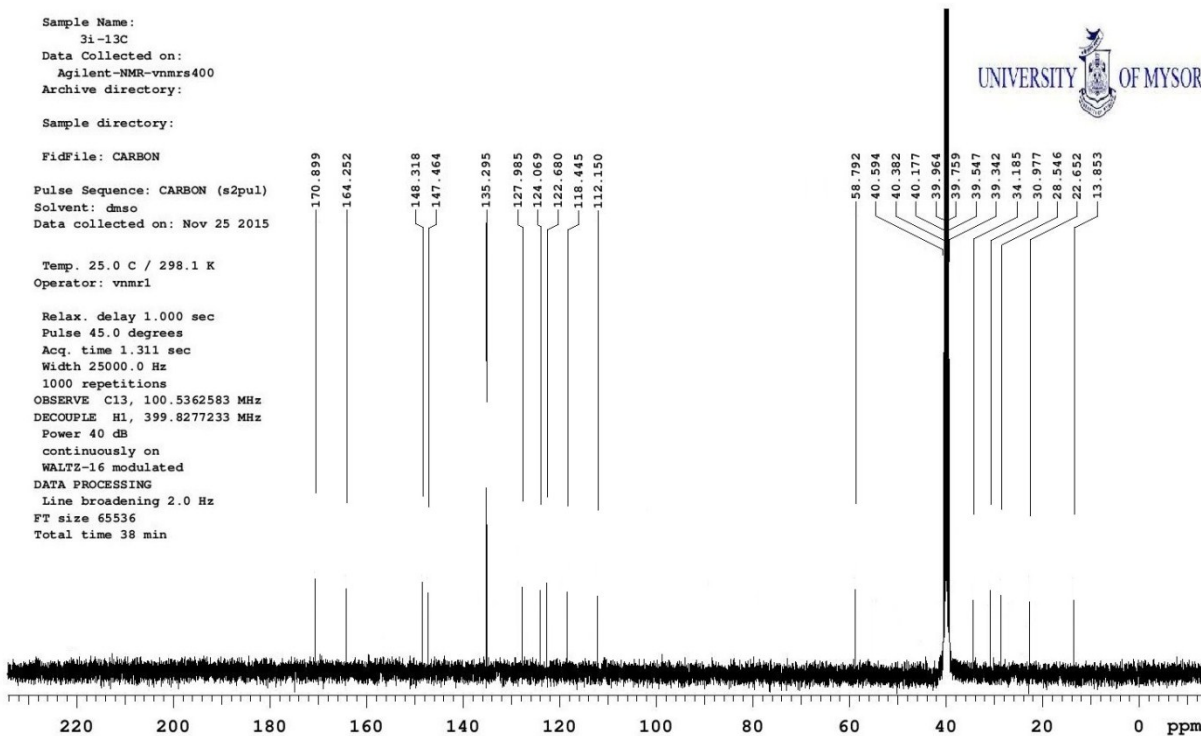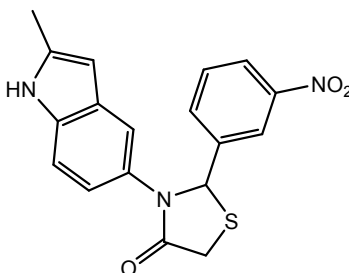

3j

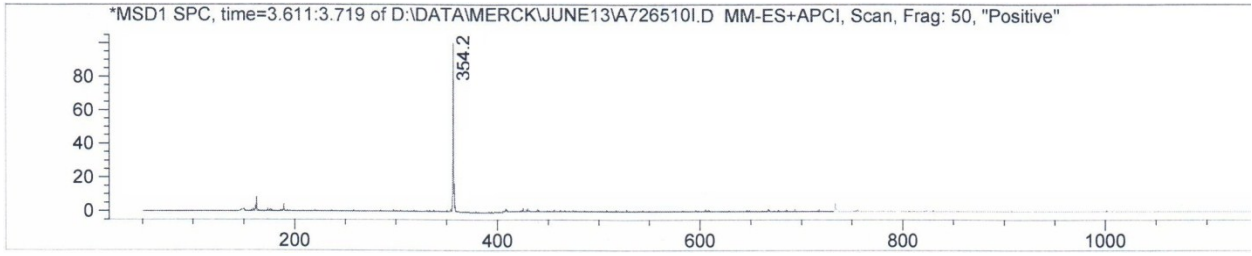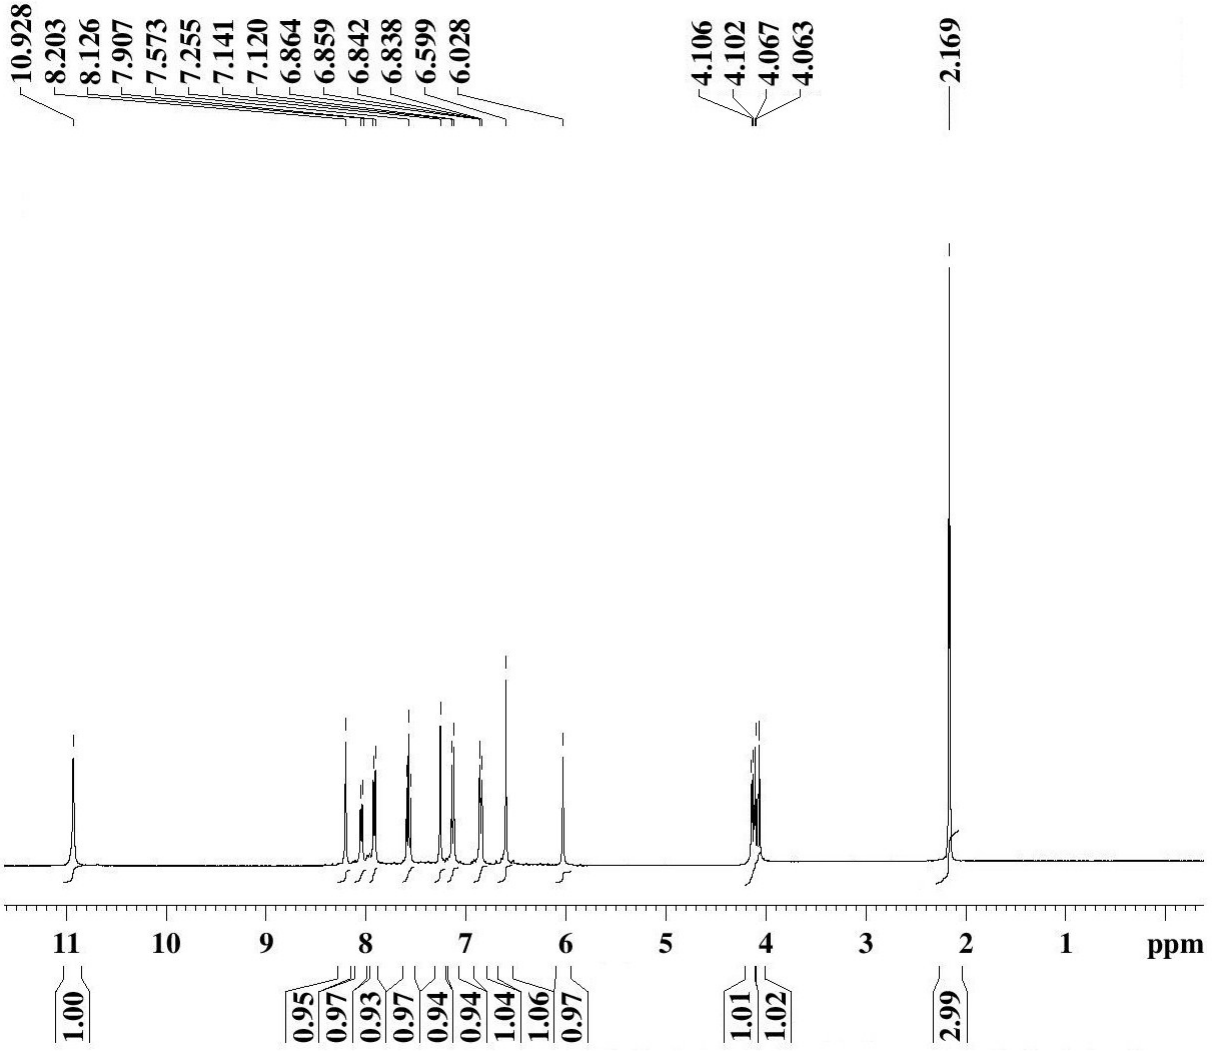

Sample Name:  
3j -13C  
Data Collected on:  
Agilent-NMR-vnmrs400  
Archive directory:

Sample directory:

FidFile: CARBON

Pulse Sequence: CARBON (s2pul)  
Solvent: dmsc  
Data collected on: Apr 29 2014

Temp. 25.0 C / 298.1 K  
Operator: vnmr1

Relax. delay 1.000 sec  
Pulse 45.0 degrees  
Acq. time 1.311 sec  
Width 25000.0 Hz  
1000 repetitions  
OBSERVE C13, 100.5362583 MHz  
DECOUPLE H1, 399.8277233 MHz  
Power 40 dB  
continuously on  
WALTZ-16 modulated  
DATA PROCESSING  
Line broadening 2.0 Hz  
FT size 65536  
Total time 38 min

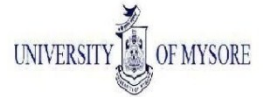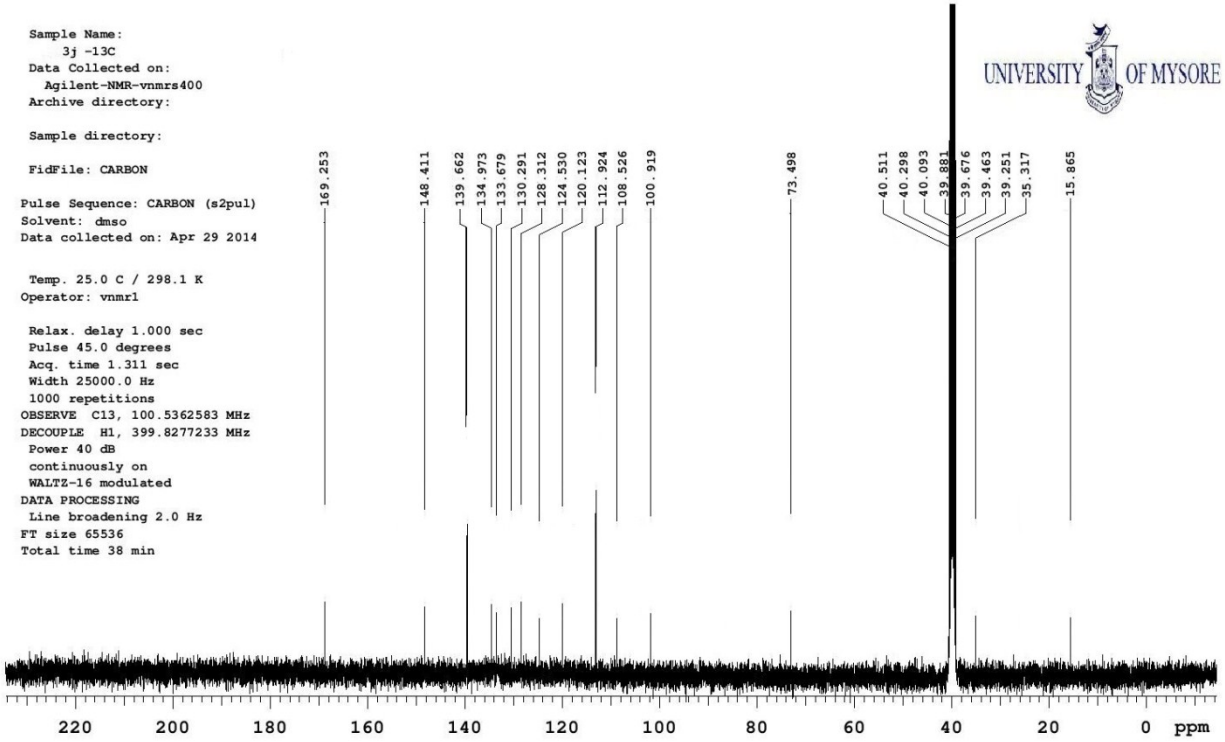

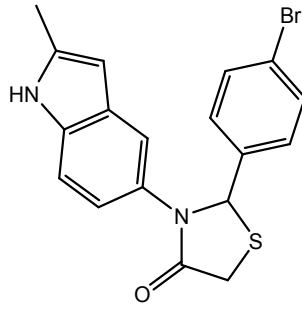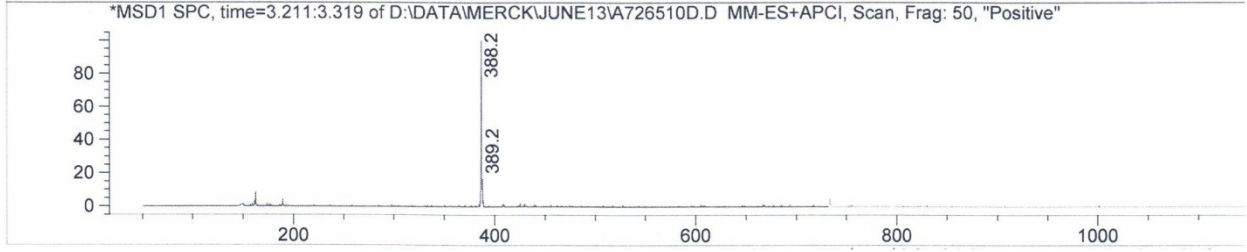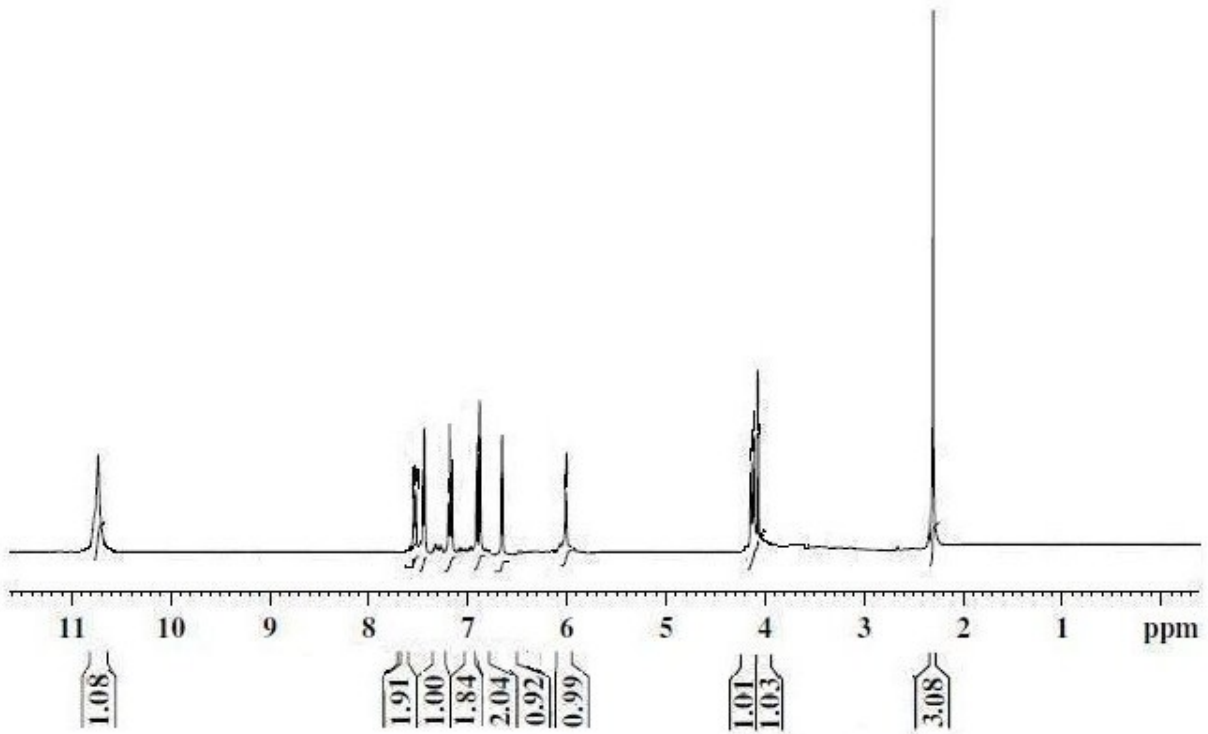

Sample Name:  
3k-13C  
Data Collected on:  
Agilent-NMR-vnmrs400  
Archive directory:

Sample directory:  
FidFile: CARBON

Pulse Sequence: CARBON (s2pul)  
Solvent: cdcl3  
Data collected on: Nov 25 2015

Temp. 25.0 C / 298.1 K  
Operator: vnmrl

Relax. delay 1.000 sec  
Pulse 45.0 degrees  
Acq. time 1.311 sec  
Width 25000.0 Hz  
1000 repetitions  
OBSERVE C13, 100.5362583 MHz  
DECOUPLE H1, 399.8277233 MHz  
Power 40 dB  
continuously on  
WALTZ-16 modulated  
DATA PROCESSING  
Line broadening 2.0 Hz  
FT size 65536  
Total time 38 min

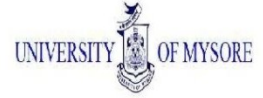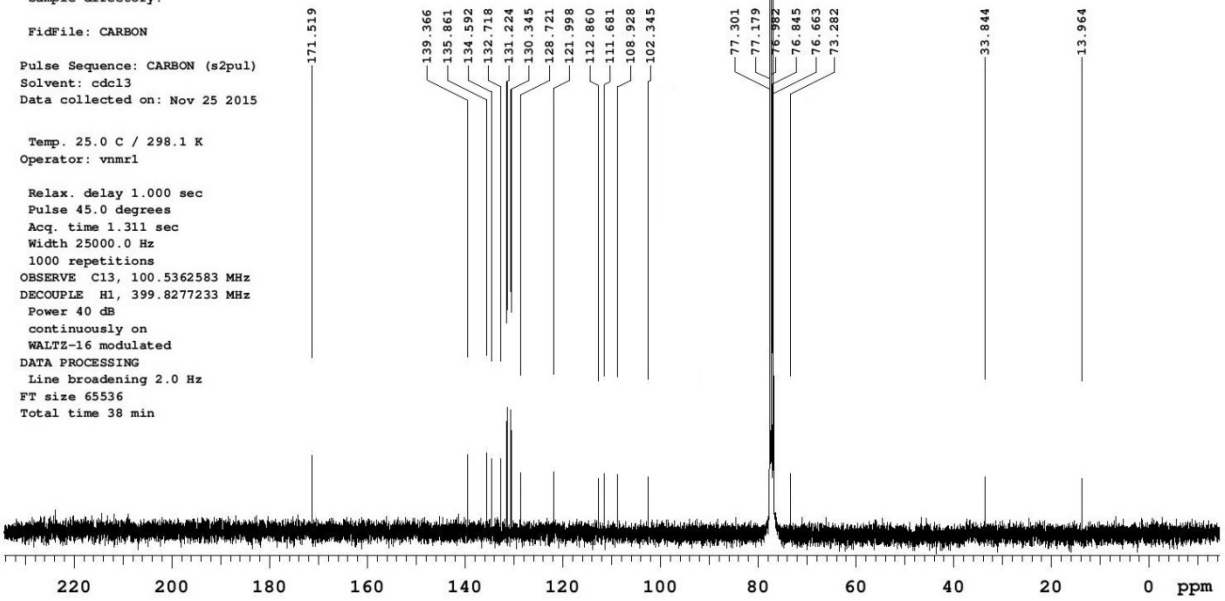



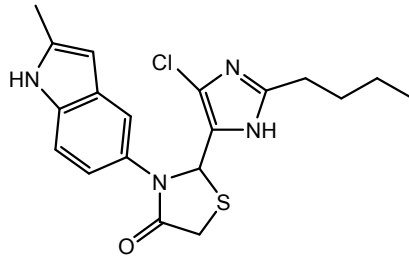

3I

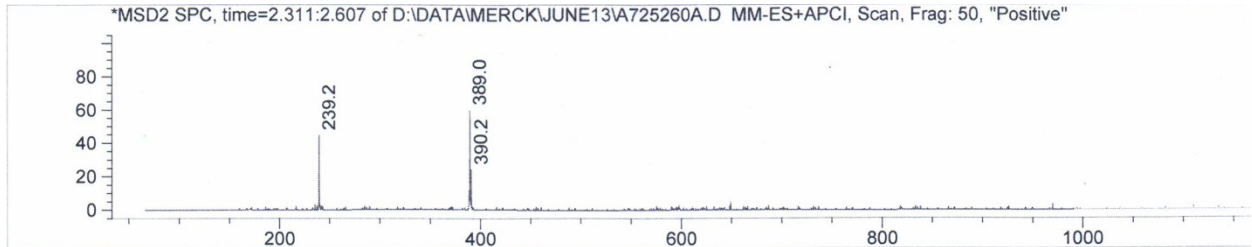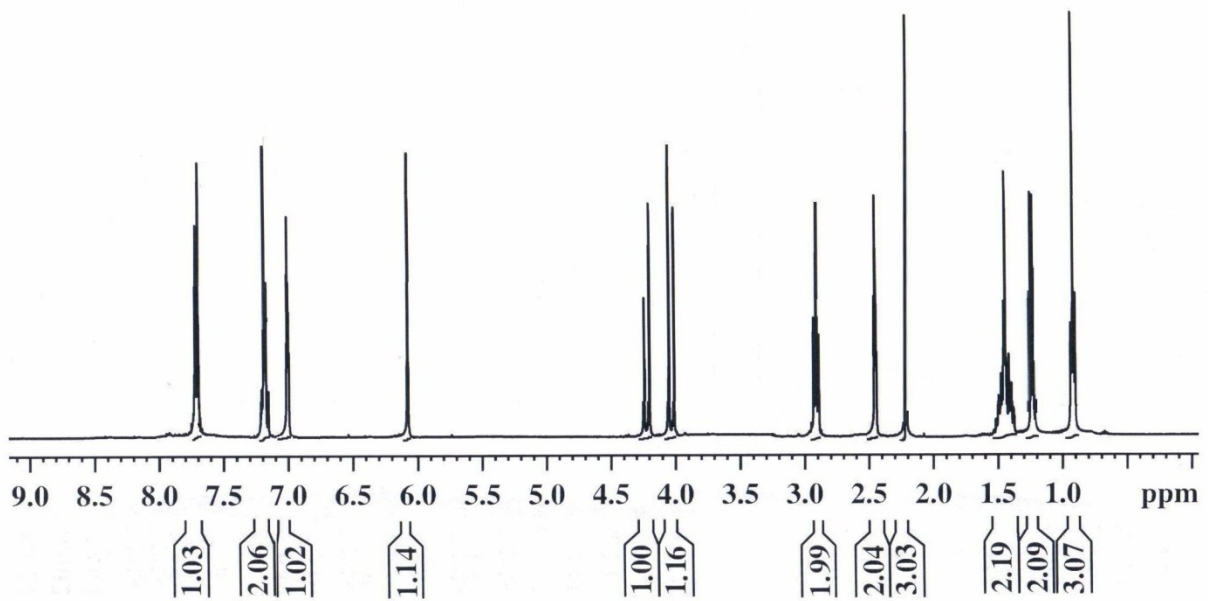

Sample Name:  
31 -13C  
Data Collected on:  
Agilent-NMR-vnmrs400  
Archive directory:

Sample directory:  
FidFile: CARBON

Pulse Sequence: CARBON (s2pul)  
Solvent: dmsc  
Data collected on: Apr 29 2014

Temp. 25.0 C / 298.1 K  
Operator: vnmr1

Relax. delay 1.000 sec  
Pulse 45.0 degrees  
Acq. time 1.311 sec  
Width 25000.0 Hz  
1000 repetitions  
OBSERVE C13, 100.5362583 MHz  
DECOUPLE H1, 399.8277233 MHz  
Power 40 dB  
continuously on  
WALTZ-16 modulated  
DATA PROCESSING  
Line broadening 2.0 Hz  
FT size 65536  
Total time 38 min

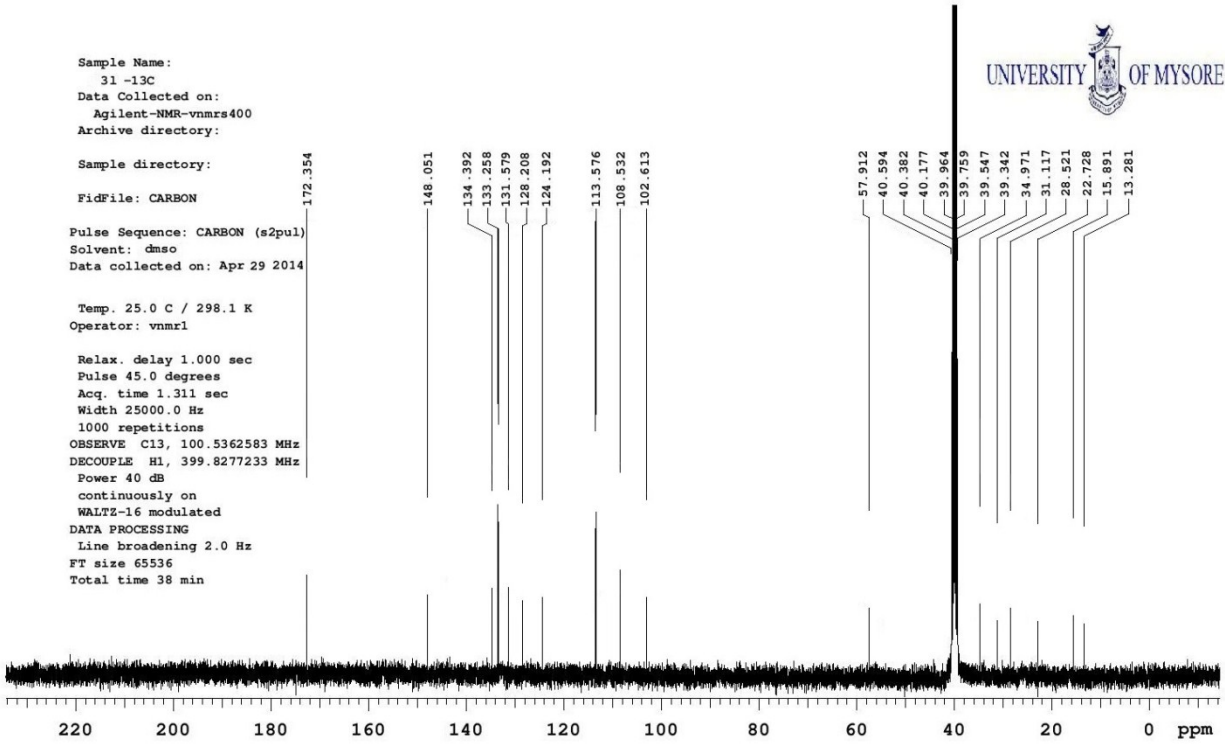

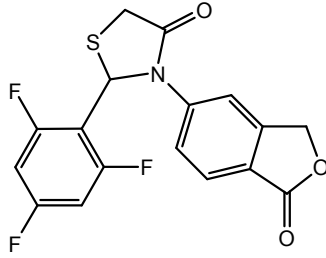

3m

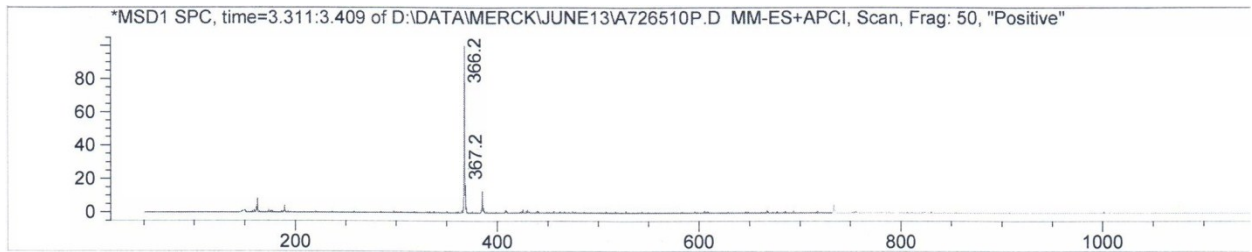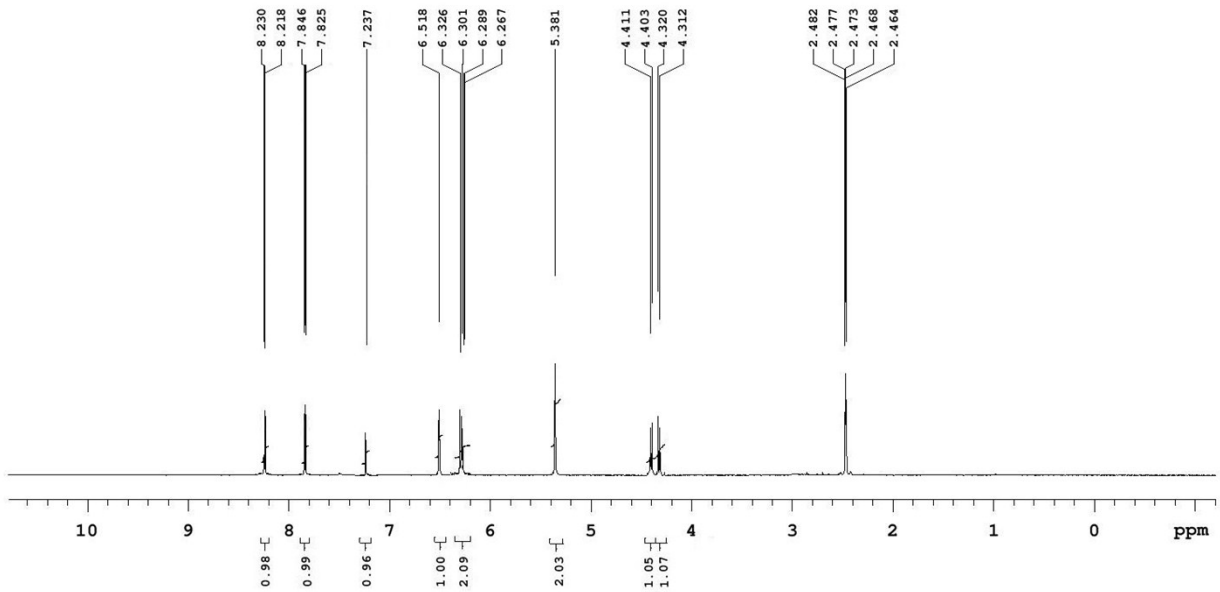

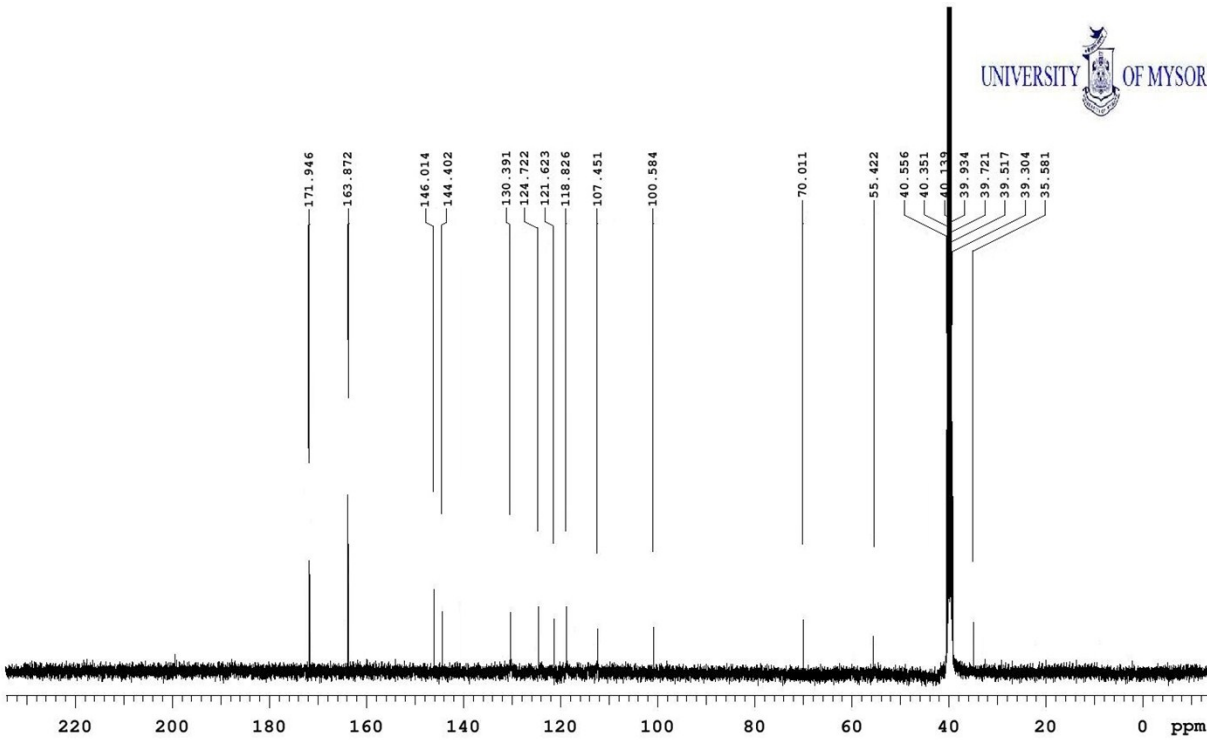

|                                                                                                                                                                                               |                                                                                                                                                                   |                                                                                                                                 |                                                                                                                                                     |
|-----------------------------------------------------------------------------------------------------------------------------------------------------------------------------------------------|-------------------------------------------------------------------------------------------------------------------------------------------------------------------|---------------------------------------------------------------------------------------------------------------------------------|-----------------------------------------------------------------------------------------------------------------------------------------------------|
| <p><b>PULSE SEQUENCE</b><br/>         Relax. delay 1.000 sec<br/>         Pulse 45.0 degrees<br/>         Acq. time 1.311 sec<br/>         Width 25000.0 Hz<br/>         2282 repetitions</p> | <p><b>OBSERVE</b> C13, 100.5367359<br/> <b>DECOUPLE</b> H1, 399.8296225<br/>         Power 40 dB<br/>         continuously on<br/>         WALTZ-16 modulated</p> | <p><b>DATA PROCESSING</b><br/>         Line broadening 0.5 Hz<br/>         FT size 65536<br/>         Total time 87 minutes</p> | <p>1402374-3M-13C<br/>         Solvent: dms0<br/>         Ambient temperature<br/>         Operator: vnmr1<br/>         VNMR5-400 "Agilent-NMR"</p> |
|-----------------------------------------------------------------------------------------------------------------------------------------------------------------------------------------------|-------------------------------------------------------------------------------------------------------------------------------------------------------------------|---------------------------------------------------------------------------------------------------------------------------------|-----------------------------------------------------------------------------------------------------------------------------------------------------|

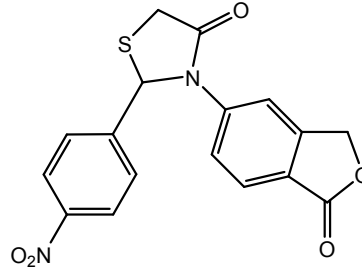

3n

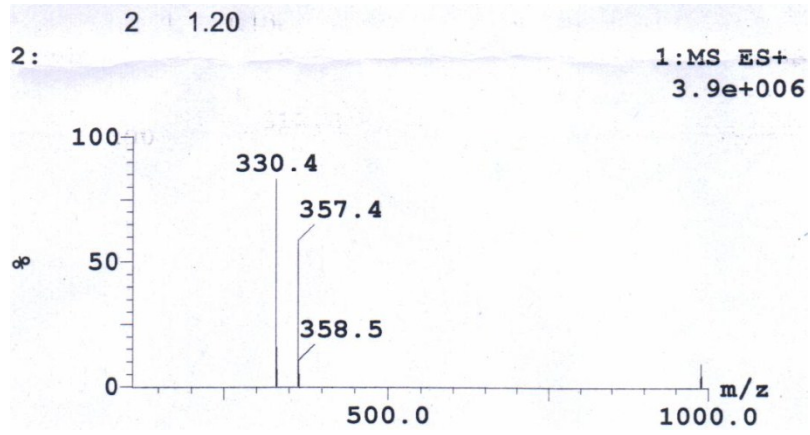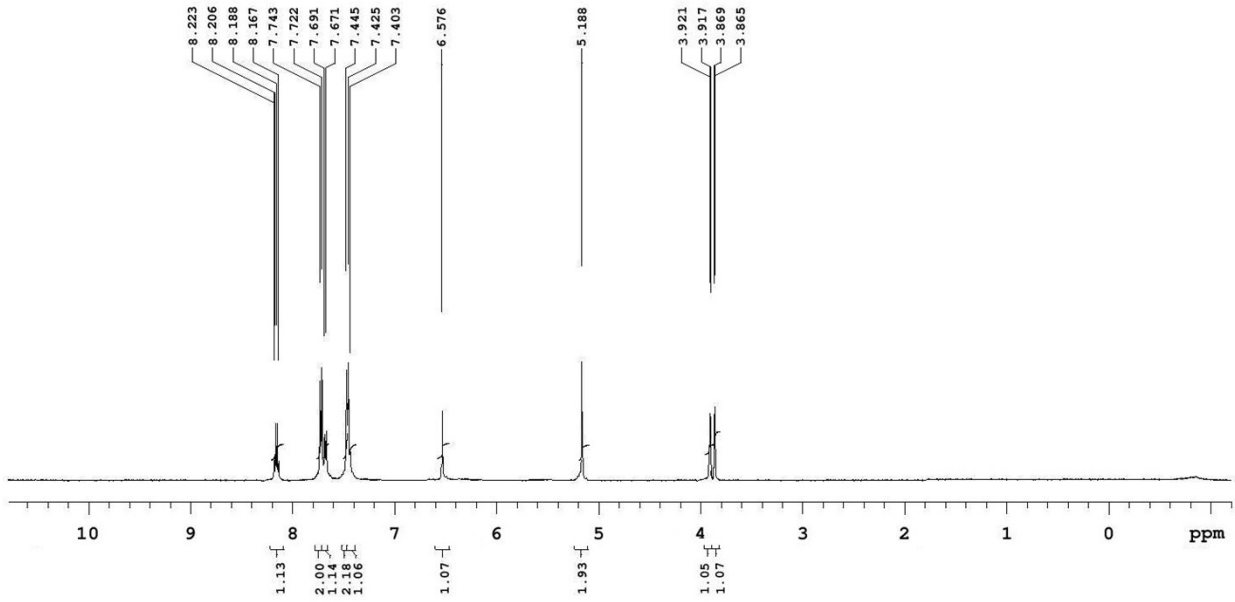

Sample Name:  
3n-13C  
Data Collected on:  
Agilent-NMR-vnmrs400  
Archive directory:

Sample directory:  
FidFile: CARBON

Pulse Sequence: CARBON (s2pu1)  
Solvent: cdcl3  
Data collected on: Nov 25 2015

Temp. 25.0 C / 298.1 K  
Operator: vnmr1

Relax. delay 1.000 sec  
Pulse 45.0 degrees  
Acq. time 1.311 sec  
Width 25000.0 Hz  
1000 repetitions  
OBSERVE C13, 100.5362583 MHz  
DECOUPLE H1, 399.8277233 MHz  
Power 40 dB  
continuously on  
WALTZ-16 modulated  
DATA PROCESSING  
Line broadening 2.0 Hz  
FT size 65536  
Total time 38 min

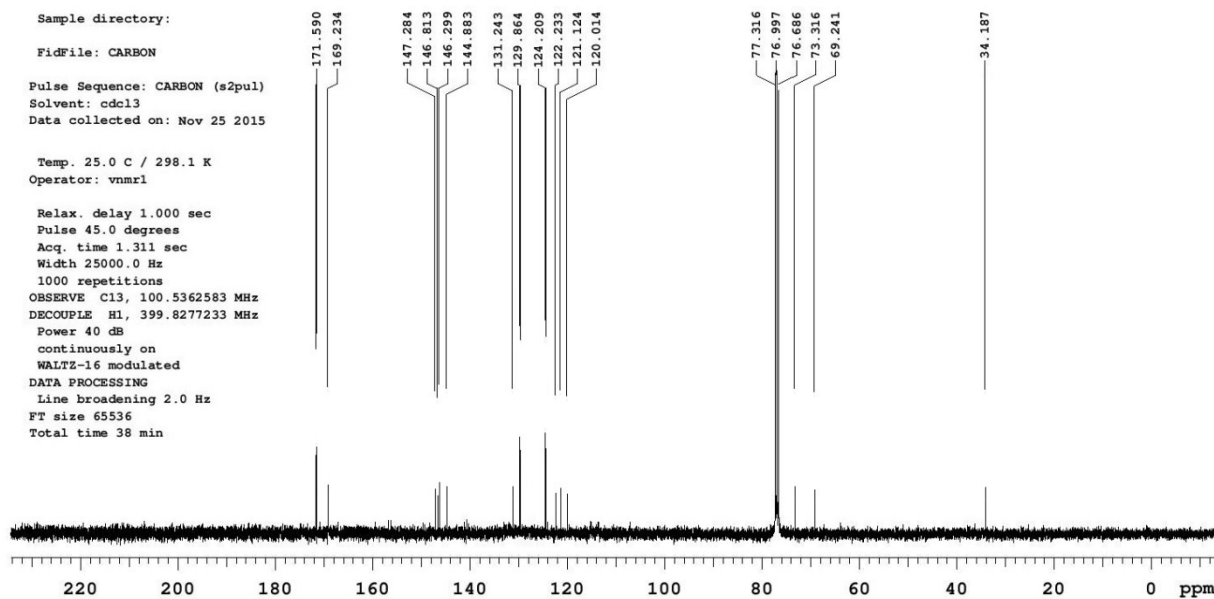

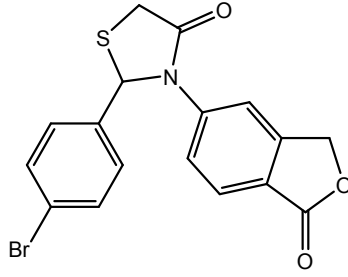

3o

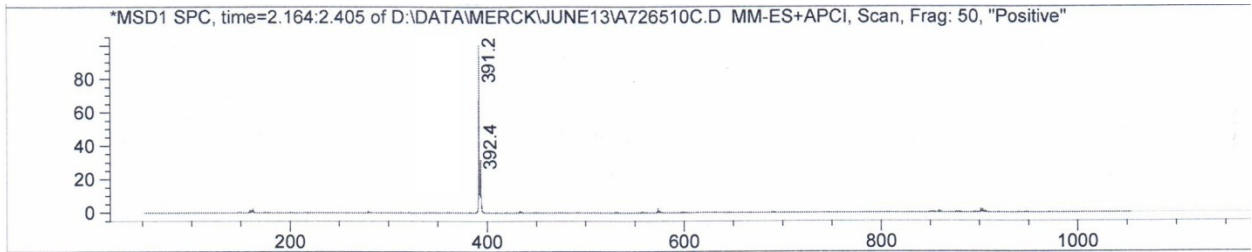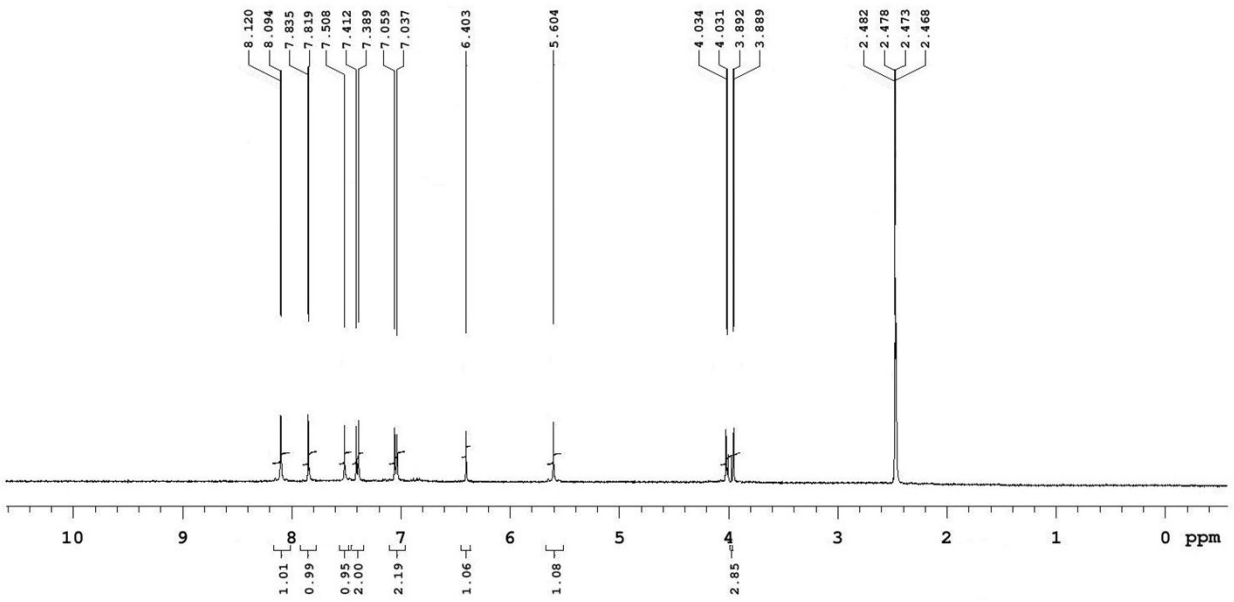

Sample Name:  
3o-13C  
Data Collected on:  
Agilent-NMR-vnmrs400  
Archive directory:

Sample directory:

FidFile: CARBON

Pulse Sequence: CARBON (s2pul)  
Solvent: cdcl3  
Data collected on: Nov 25 2015

Temp. 25.0 C / 298.1 K  
Operator: vnmrl

Relax. delay 1.000 sec  
Pulse 45.0 degrees  
Acq. time 1.311 sec  
Width 25000.0 Hz  
1000 repetitions  
OBSERVE C13, 100.5362583 MHz  
DECOUPLE H1, 399.8277233 MHz  
Power 40 dB  
continuously on  
WALTZ-16 modulated  
DATA PROCESSING  
Line broadening 2.0 Hz  
FT size 65536  
Total time 38 min

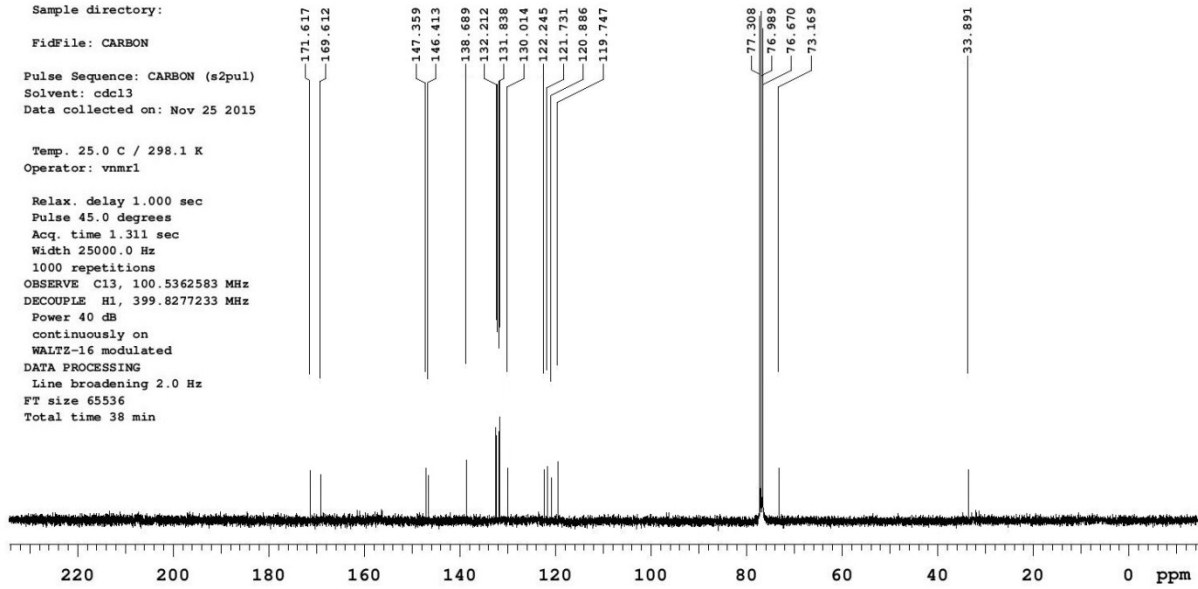

Supplement: c5nj02729b1.pdf [file c5nj02729b1.pdf]
